# Supplementary material for: Effect of Iodide-Based Organic Salts and Ionic Liquid Additives in Dye-Sensitized Solar Cell Performance
Source: MDPI journal article supplement (doi:10.3390/nano12172988), 2022-08-29
Supplement: s1 [file s1]

## Supporting Information

# Effect of iodide based organic salts and ionic liquid additives in dye-sensitized solar cell performance

João Sarrato<sup>1,†</sup>, Ana Lucia Pinto<sup>1,†</sup>, Hugo Cruz<sup>1,†</sup>, Noémi Jordão<sup>1</sup>, Gabriela Malta<sup>1</sup>, Paula S. Branco<sup>1</sup>, J. Carlos Lima<sup>1,\*</sup> and Luis C. Branco<sup>1,\*</sup>

<sup>1</sup>LAQV-REQUIMTE, Department of Chemistry, NOVA School of Science and Technology, FCT NOVA, Universidade NOVA de Lisboa, 2829-516, Caparica, Portugal

\*Correspondence: [lima@fct.unl.pt](mailto:lima@fct.unl.pt) (J.C.L.); [l.branco@fct.unl.pt](mailto:l.branco@fct.unl.pt) (L.B.)

<sup>†</sup>These authors contributed equally to this work.

## Contents

|                                                                                                                                   |    |
|-----------------------------------------------------------------------------------------------------------------------------------|----|
| <b>Synthesis</b> .....                                                                                                            | 4  |
| General method for the synthesis of N-ethyl-methylpyridinium iodides:.....                                                        | 4  |
| General method for the synthesis of N-hexyl-methylpyridinium iodides: .....                                                       | 4  |
| <b>Spectra</b> .....                                                                                                              | 6  |
| <sup>1</sup> H-NMR (400 MHz, CDCl <sub>3</sub> ) spectrum of 3-decyl-1,2-dimethylimidazolium iodide ( <b>4</b> ):.....            | 6  |
| <sup>13</sup> C-NMR (101 MHz, CDCl <sub>3</sub> ) spectrum of 3-decyl-1,2-dimethylimidazolium iodide ( <b>4</b> ) .....           | 6  |
| MS spectra of 3-decyl-1,2-dimethylimidazolium iodide ( <b>4</b> ):.....                                                           | 7  |
| <sup>1</sup> H-NMR (400 MHz, Methanol- <i>d</i> <sub>4</sub> ) spectrum of N-ethyl-3-methylpyridinium iodide ( <b>5</b> ):.....   | 8  |
| <sup>1</sup> H-NMR (400 MHz, Methanol- <i>d</i> <sub>4</sub> ) spectrum of N-ethyl-4-methylpyridinium iodide ( <b>7</b> ):.....   | 8  |
| <sup>1</sup> H-NMR (400 MHz, Methanol- <i>d</i> <sub>4</sub> ) spectrum of N-hexyl-3-methylpyridinium iodide ( <b>6</b> ): .....  | 9  |
| <sup>13</sup> C-NMR (101 MHz, Methanol- <i>d</i> <sub>4</sub> ) spectrum of N-hexyl-3-methylpyridinium iodide ( <b>6</b> ): ..... | 9  |
| MS spectra of N-hexyl-3-methylpyridinium iodide ( <b>6</b> ):.....                                                                | 10 |
| <sup>1</sup> H-NMR (400 MHz, Methanol- <i>d</i> <sub>4</sub> ) spectrum of N-hexyl-4-methylpyridinium iodide ( <b>8</b> ): .....  | 11 |
| <b>Electrochemical Impedance Spectroscopy</b> .....                                                                               | 12 |
| <b>Without 4-TBP:</b> .....                                                                                                       | 12 |
| Nyquist (top) and Bode (bottom) plots of reference: .....                                                                         | 12 |
| Nyquist (top) and Bode (bottom) plots of <b>E1</b> :.....                                                                         | 13 |
| Nyquist (top) and Bode (bottom) plots of <b>E2</b> :.....                                                                         | 14 |
| Nyquist (top) and Bode (bottom) plots of <b>E3</b> :.....                                                                         | 15 |
| Nyquist (top) and Bode (bottom) plots of <b>E4</b> :.....                                                                         | 16 |
| Nyquist (top) and Bode (bottom) plots of <b>E5</b> :.....                                                                         | 17 |
| Nyquist (top) and Bode (bottom) plots of <b>E6</b> :.....                                                                         | 18 |
| Nyquist (top) and Bode (bottom) plots of <b>E7</b> :.....                                                                         | 19 |
| Nyquist (top) and Bode (bottom) plots of <b>E8</b> :.....                                                                         | 20 |
| Nyquist (top) and Bode (bottom) plots of <b>E9</b> :.....                                                                         | 21 |
| Nyquist (top) and Bode (bottom) plots of <b>E10</b> :.....                                                                        | 22 |
| Nyquist (top) and Bode (bottom) plots of <b>E11</b> :.....                                                                        | 23 |
| <b>With 4-TBP:</b> .....                                                                                                          | 24 |
| Nyquist (top) and Bode (bottom) plots of reference: .....                                                                         | 24 |
| Nyquist (top) and Bode (bottom) plots of <b>E1</b> :.....                                                                         | 25 |
| Nyquist (top) and Bode (bottom) plots of <b>E2</b> :.....                                                                         | 26 |
| Nyquist (top) and Bode (bottom) plots of <b>E3</b> :.....                                                                         | 27 |
| Nyquist (top) and Bode (bottom) plots of <b>E4</b> :.....                                                                         | 28 |
| Nyquist (top) and Bode (bottom) plots of <b>E5</b> :.....                                                                         | 29 |
| Nyquist (top) and Bode (bottom) plots of <b>E6</b> :.....                                                                         | 30 |

|                                                           |    |
|-----------------------------------------------------------|----|
| Nyquist (top) and Bode (bottom) plots of <b>E7</b> .....  | 31 |
| Nyquist (top) and Bode (bottom) plots of <b>E8</b> .....  | 32 |
| Nyquist (top) and Bode (bottom) plots of <b>E9</b> .....  | 33 |
| Nyquist (top) and Bode (bottom) plots of <b>E10</b> ..... | 34 |
| Nyquist (top) and Bode (bottom) plots of <b>E11</b> ..... | 35 |

## Synthesis

General method for the synthesis of N-ethyl-methylpyridinium iodides:

A mixture of methylpyridine, iodoethane (1.2 eq) and 10 mL of acetonitrile was heated to 60°C in the microwave equipment with stirring until completion. After evaporating the solvent, the product was washed 5 times with diethyl ether and dried.

N-ethyl-3-methylpyridinium iodide (**5**):

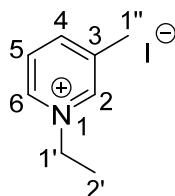

Starting from 10 g (107.4 mmol) of 3-methylpyridine and 20.1 g of iodoethane, 24.8 g (92.7%) of N-ethyl-3-methylpyridinium iodide were obtained.

**<sup>1</sup>H NMR** (400 MHz, Methanol-*d*<sub>4</sub>)  $\delta$  (ppm) 8.94 (s, 1H), 8.86 (d, *J* = 6.1 Hz, 1H), 8.44 (d, *J* = 8.0 Hz, 1H), 8.01 (t, *J* = 7.2 Hz, 1H), 4.67 (q, *J* = 7.4 Hz, 2H), 2.61 (s, 3H), 1.67 (t, *J* = 7.4 Hz, 3H).

N-ethyl-4-methylpyridinium iodide (**7**):

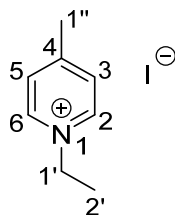

Starting from 8.5 g (91.3 mmol) of 4-methylpyridine and 17.1 g of iodoethane, 21.8 g (95.9%) of N-ethyl-4-methylpyridinium iodide were obtained.

**<sup>1</sup>H NMR** (400 MHz, Methanol-*d*<sub>4</sub>)  $\delta$  (ppm) 8.89 (d, *J* = 6.3 Hz, 2H), 7.98 (d, *J* = 6.1 Hz, 2H), 4.67 (q, *J* = 7.4 Hz, 2H), 2.72 (s, 3H), 1.67 (t, *J* = 7.4 Hz, 3H).

General method for the synthesis of N-hexyl-methylpyridinium iodides:

A mixture of methylpyridine and iodoethane (1.2 eq) was heated to 80°C in the microwave equipment with stirring until completion. The product was washed 5 times with diethyl ether and dried.

N-hexyl-3-methylpyridinium iodide (**6**):

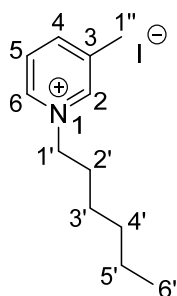

Starting from 10 g (91.3 mmol) of 3-methylpyridine and 27.2 g of iodohexane, 31.6 g (96.4%) of N-hexyl-3-methylpyridinium iodide were obtained.

**$^1\text{H}$  NMR** (400 MHz, Methanol- $d_4$ )  $\delta$  (ppm) 8.97 (s, 1H), 8.87 (d,  $J$  = 6.1 Hz, 1H), 8.45 (d,  $J$  = 8.1 Hz, 1H), 8.02 (t,  $J$  = 7.1 Hz, 1H), 4.63 (t,  $J$  = 7.7 Hz, 2H), 2.61 (s, 3H), 2.05 (p,  $J$  = 7.3 Hz, 2H), 1.41 (d,  $J$  = 10.4 Hz, 6H), 1.00 – 0.90 (m, 3H).

**$^{13}\text{C}$  NMR** (101 MHz, Methanol- $d_4$ )  $\delta$  (ppm) 147.28, 145.54, 143.06, 141.29, 128.74, 62.93, 32.42, 32.26, 26.85, 23.44, 18.49, 14.24

N-hexyl-4-methylpyridinium iodide (**8**):

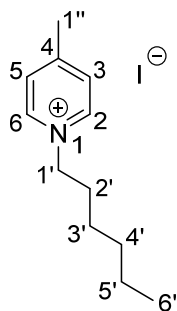

Starting from 9 g (96.6 mmol) of 4-methylpyridine and 24.6 g of iodohexane, 27.9 g (94.6%) of N-hexyl-4-methylpyridinium iodide were obtained.

**$^1\text{H}$  NMR** (400 MHz, Methanol- $d_4$ )  $\delta$  (ppm) 8.90 – 8.81 (m, 2H), 7.96 (d,  $J$  = 6.2 Hz, 2H), 4.59 (t,  $J$  = 7.6 Hz, 2H), 2.71 (s, 3H), 2.02 (t,  $J$  = 7.3 Hz, 2H), 1.38 (dq,  $J$  = 10.5, 6.4, 6.0 Hz, 6H), 0.96 – 0.91 (m, 3H).

## Spectra

$^1\text{H}$ -NMR (400 MHz,  $\text{CDCl}_3$ ) spectrum of 3-decyl-1,2-dimethylimidazolium iodide (**4**):

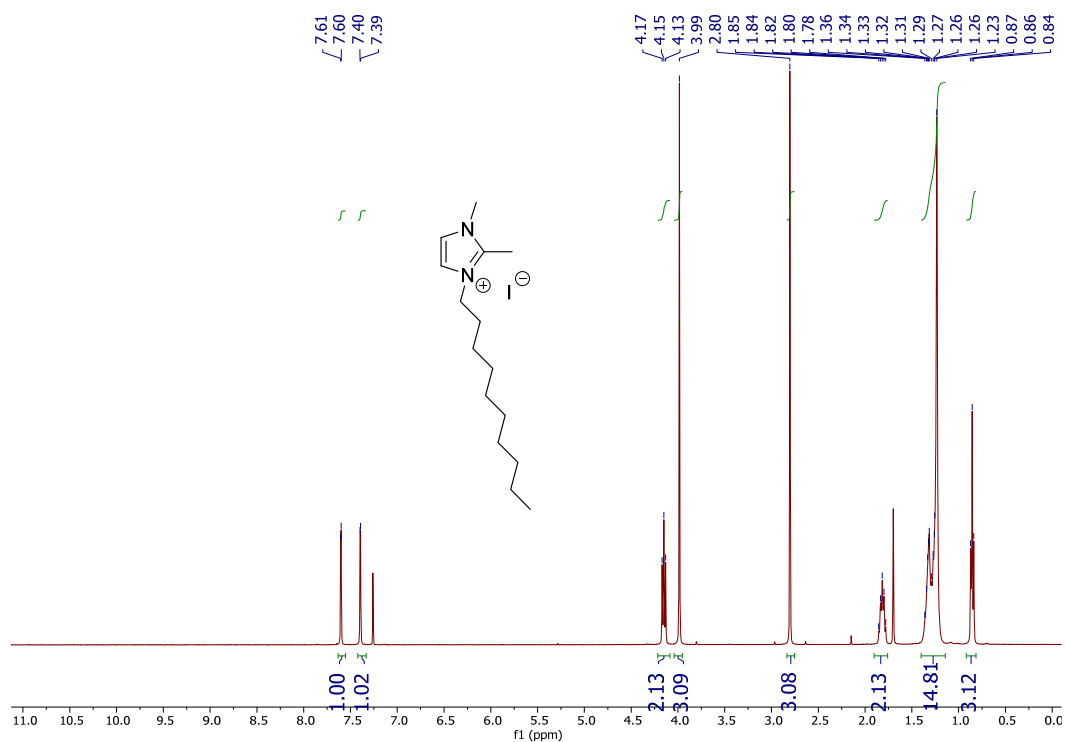

$^{13}\text{C}$ -NMR (101 MHz,  $\text{CDCl}_3$ ) spectrum of 3-decyl-1,2-dimethylimidazolium iodide (**4**)

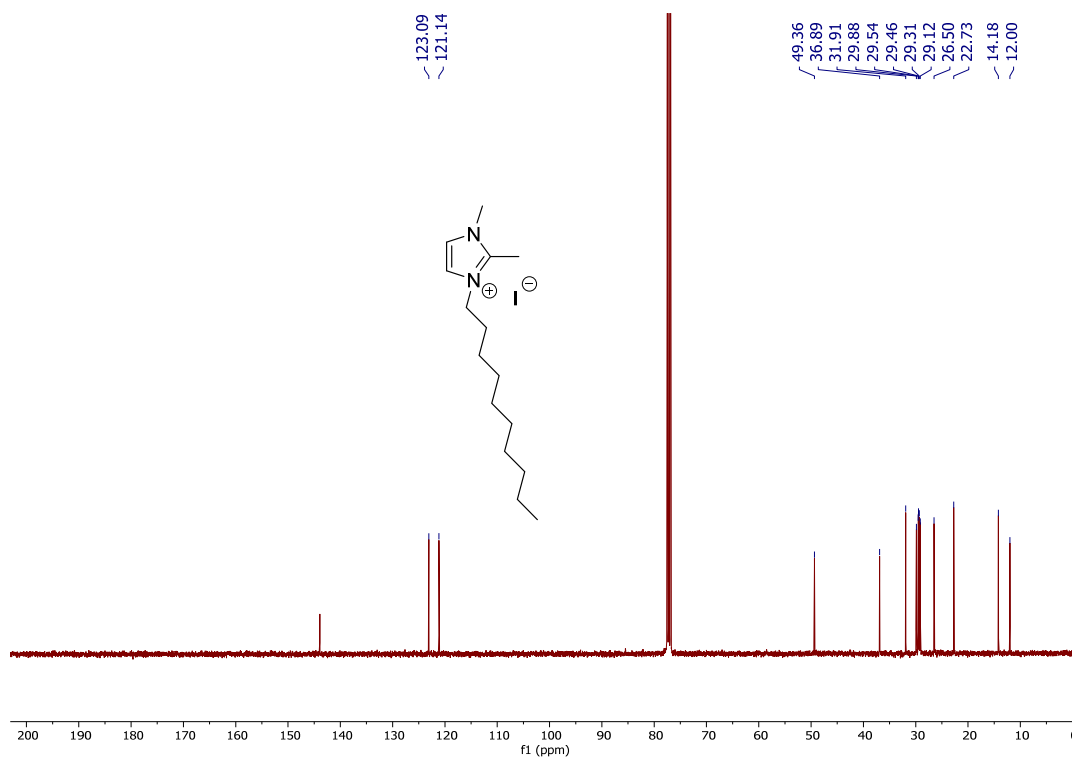

# MS spectra of 3-decyl-1,2-dimethylimidazolium iodide (**4**):

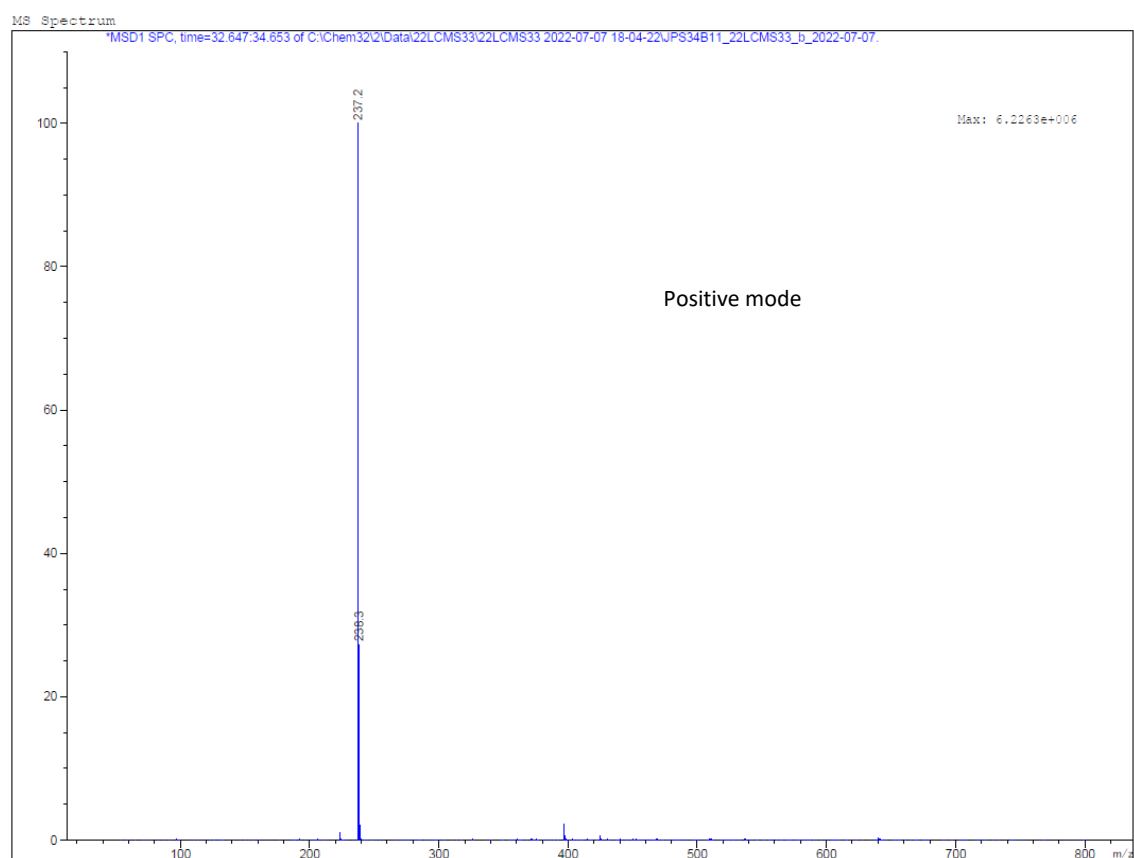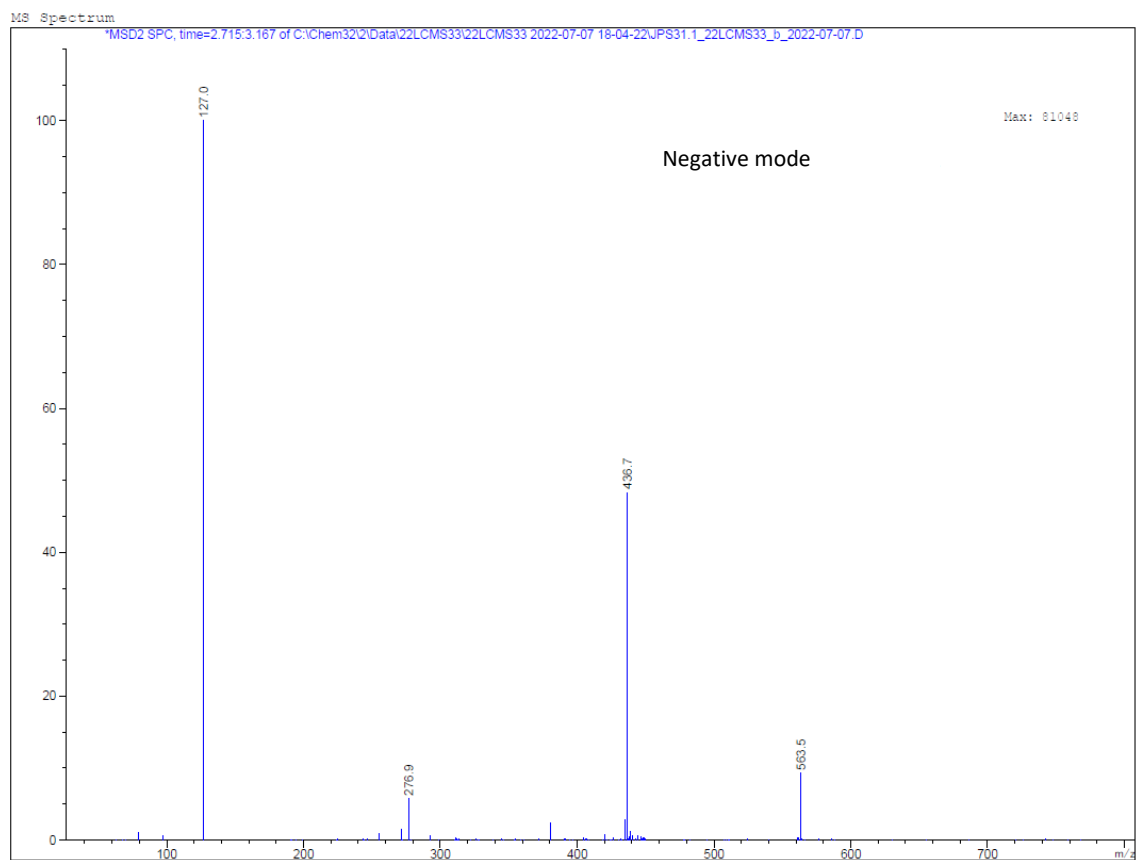

$^1\text{H}$ -NMR (400 MHz, Methanol- $d_4$ ) spectrum of N-ethyl-3-methylpyridinium iodide (**5**):

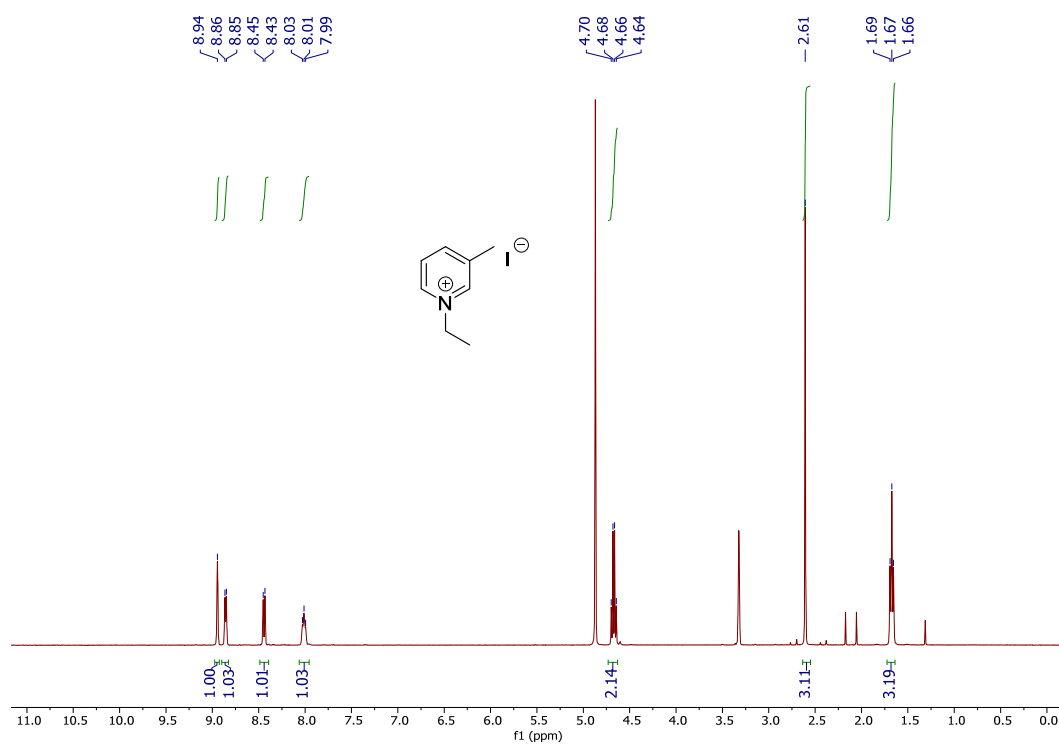

$^1\text{H}$ -NMR (400 MHz, Methanol- $d_4$ ) spectrum of N-ethyl-4-methylpyridinium iodide (**7**):

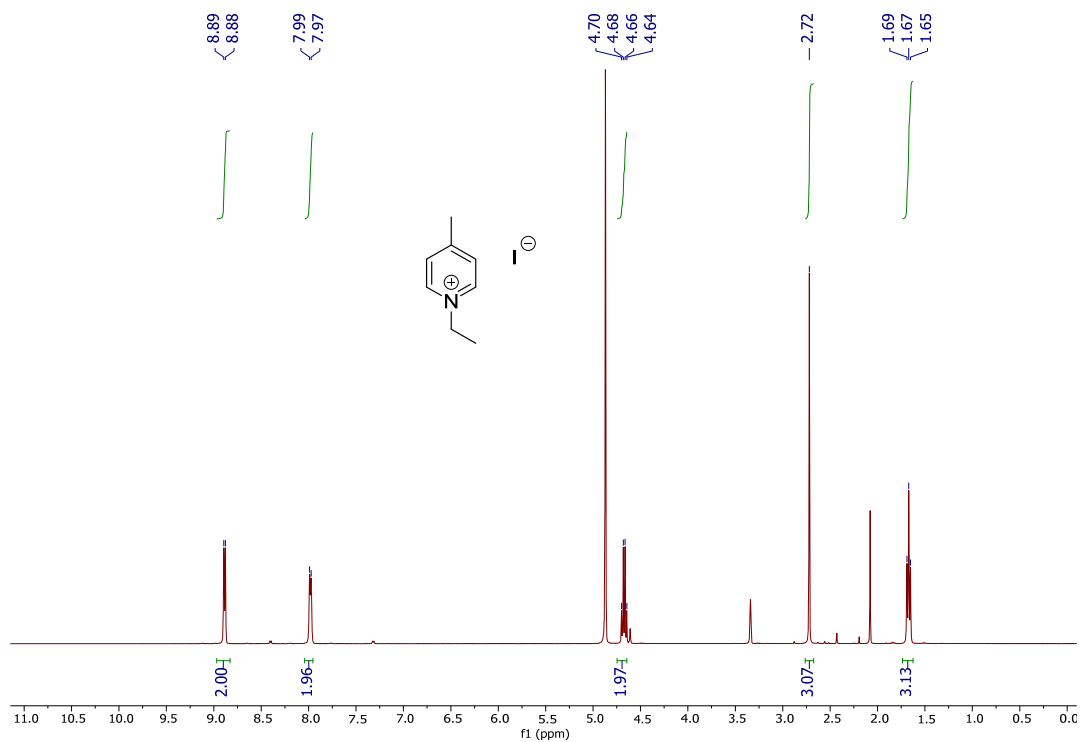



$^1\text{H}$ -NMR (400 MHz, Methanol- $d_4$ ) spectrum of N-hexyl-3-methylpyridinium iodide (**6**):

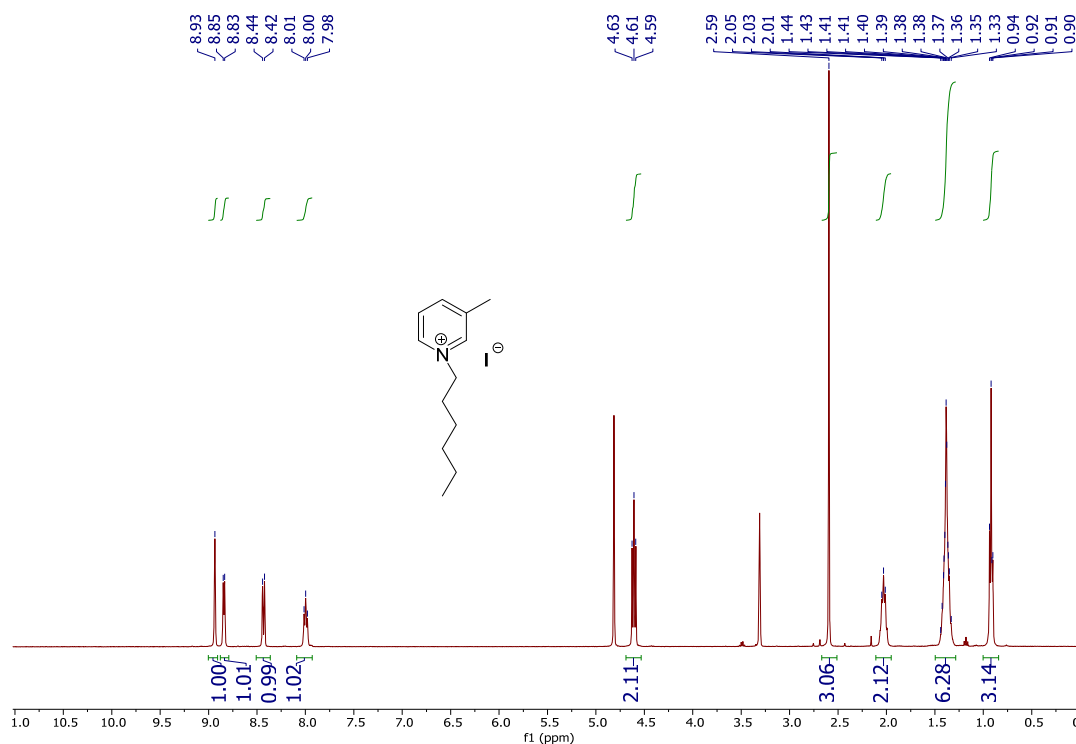

$^{13}\text{C}$ -NMR (101 MHz, Methanol- $d_4$ ) spectrum of N-hexyl-3-methylpyridinium iodide (**6**):

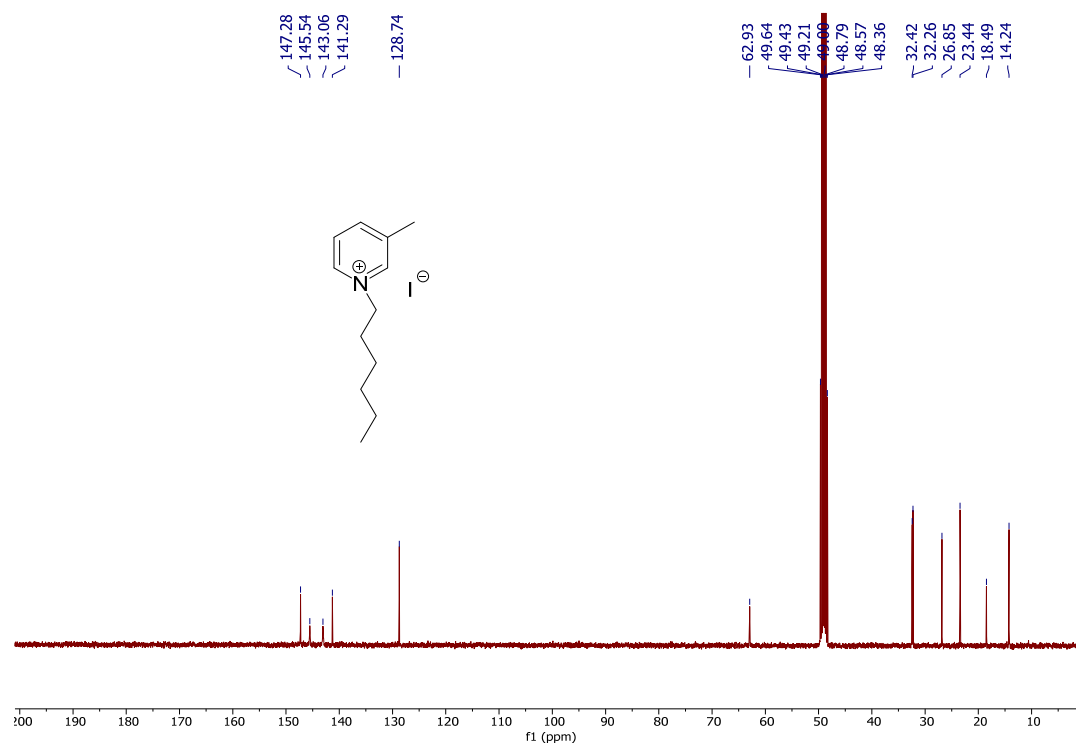

# MS spectra of N-hexyl-3-methylpyridinium iodide (6):

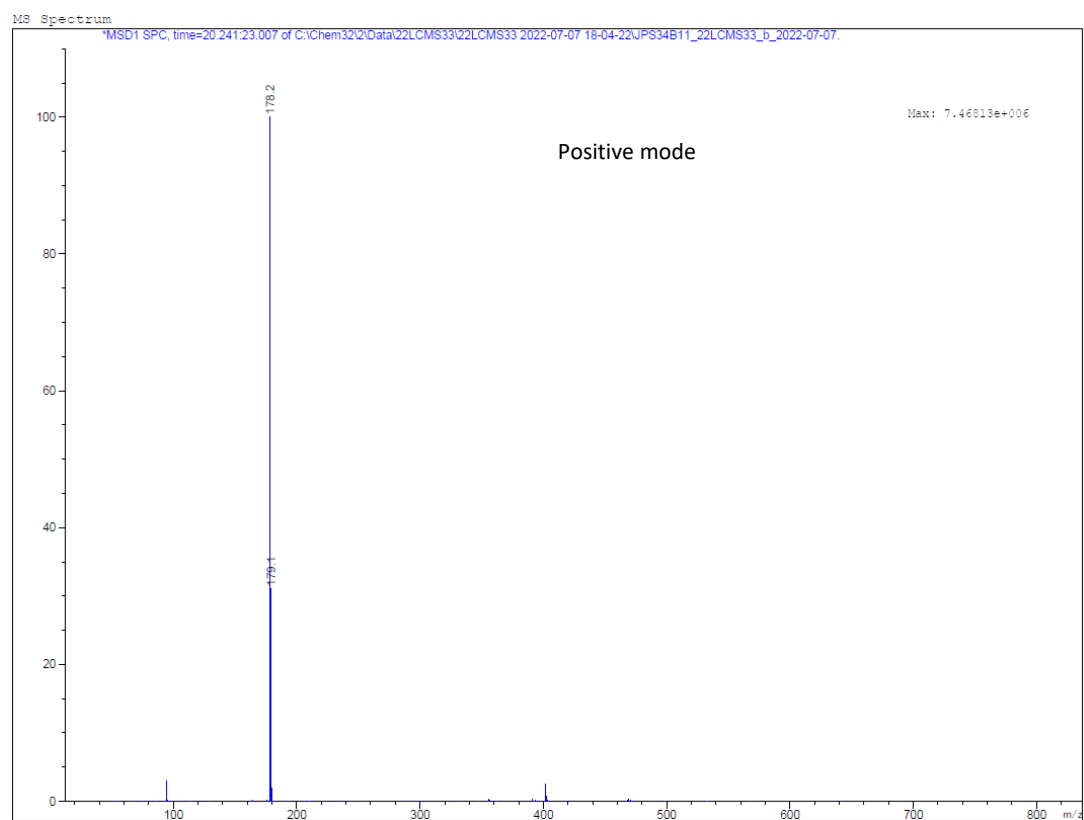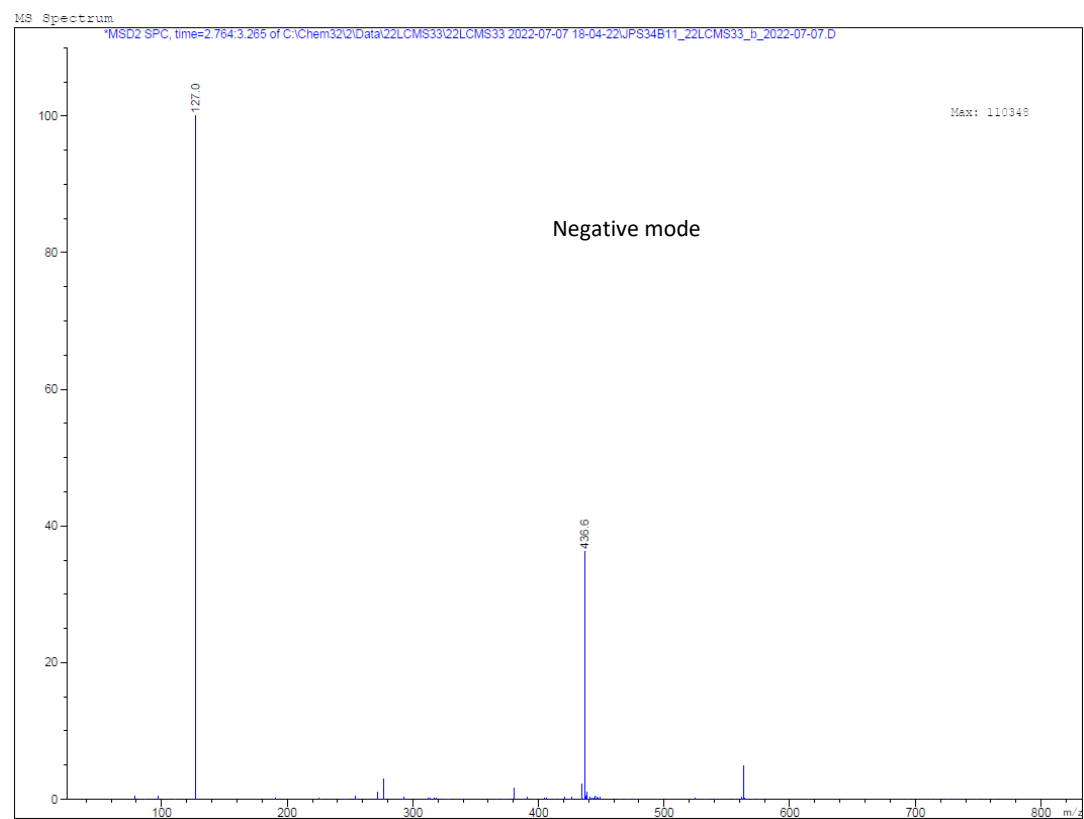

$^1\text{H}$ -NMR (400 MHz, Methanol- $d_4$ ) spectrum of N-hexyl-4-methylpyridinium iodide (**8**):

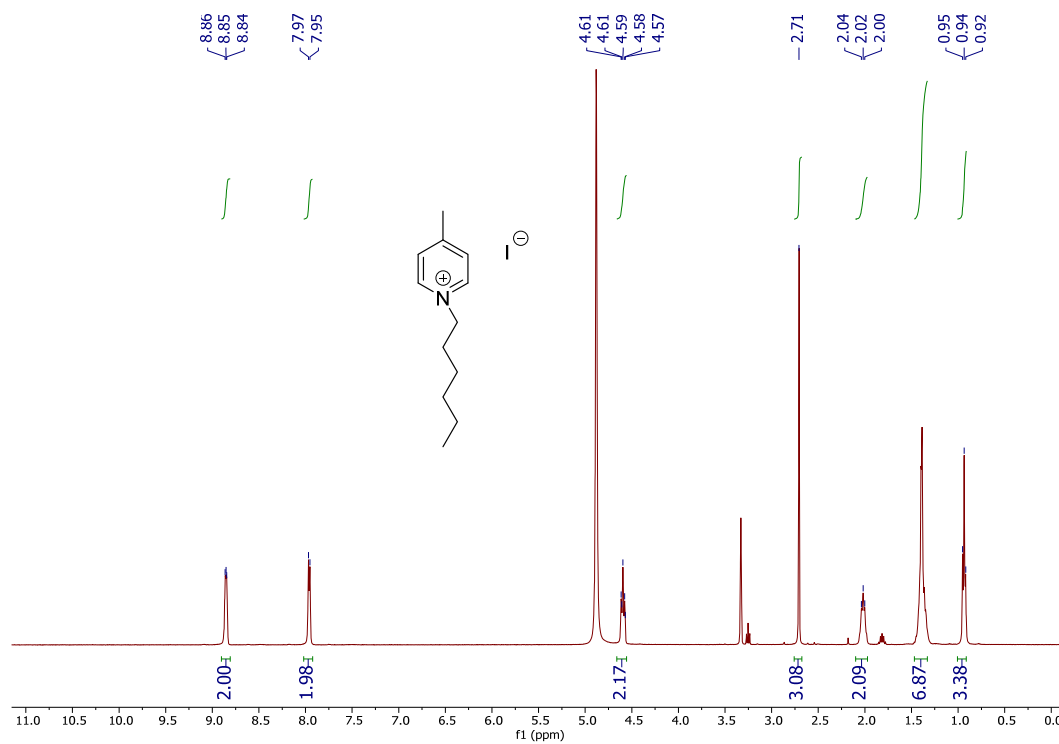

## Electrochemical Impedance Spectroscopy

Without 4-TBP:

Nyquist (top) and Bode (bottom) plots of reference:

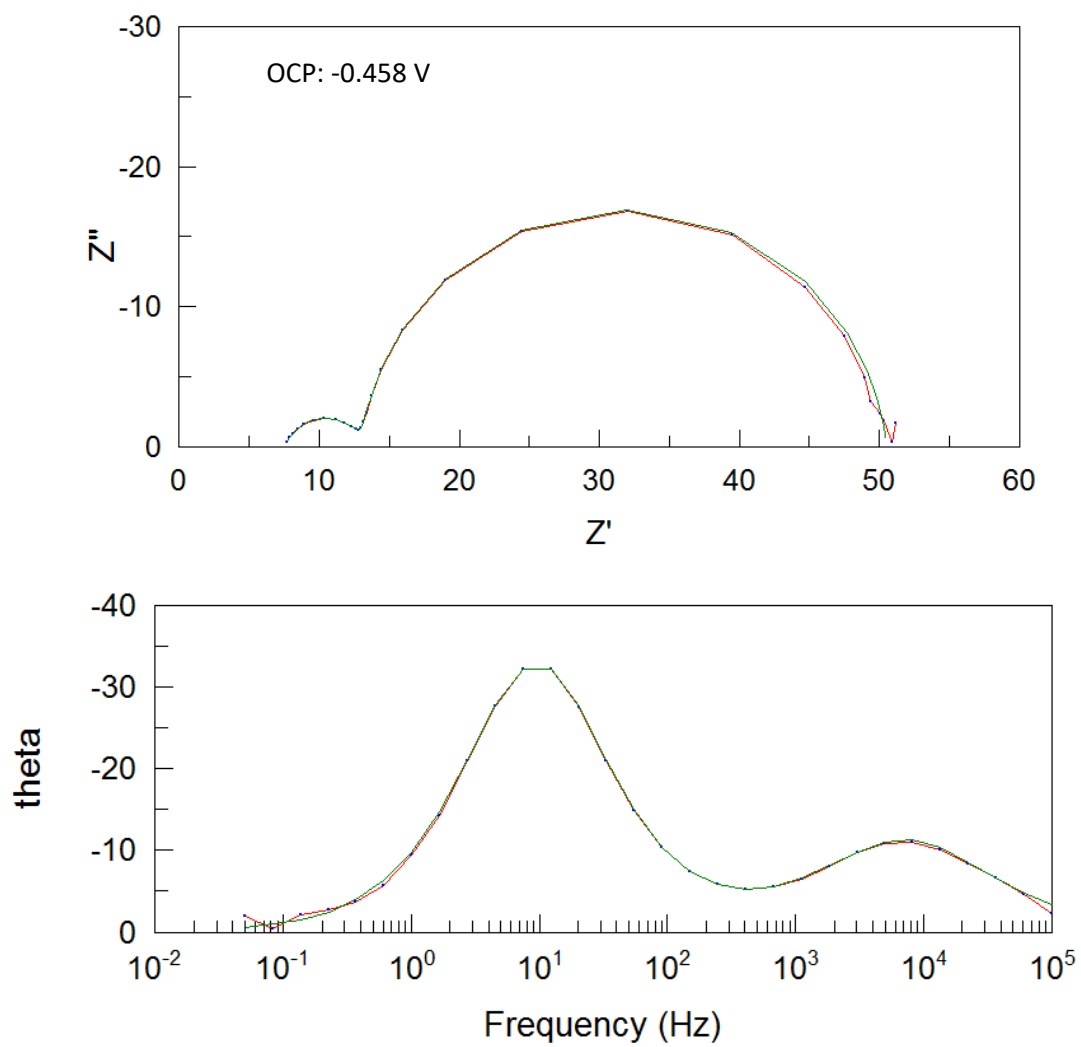

Nyquist (top) and Bode (bottom) plots of **E1**:

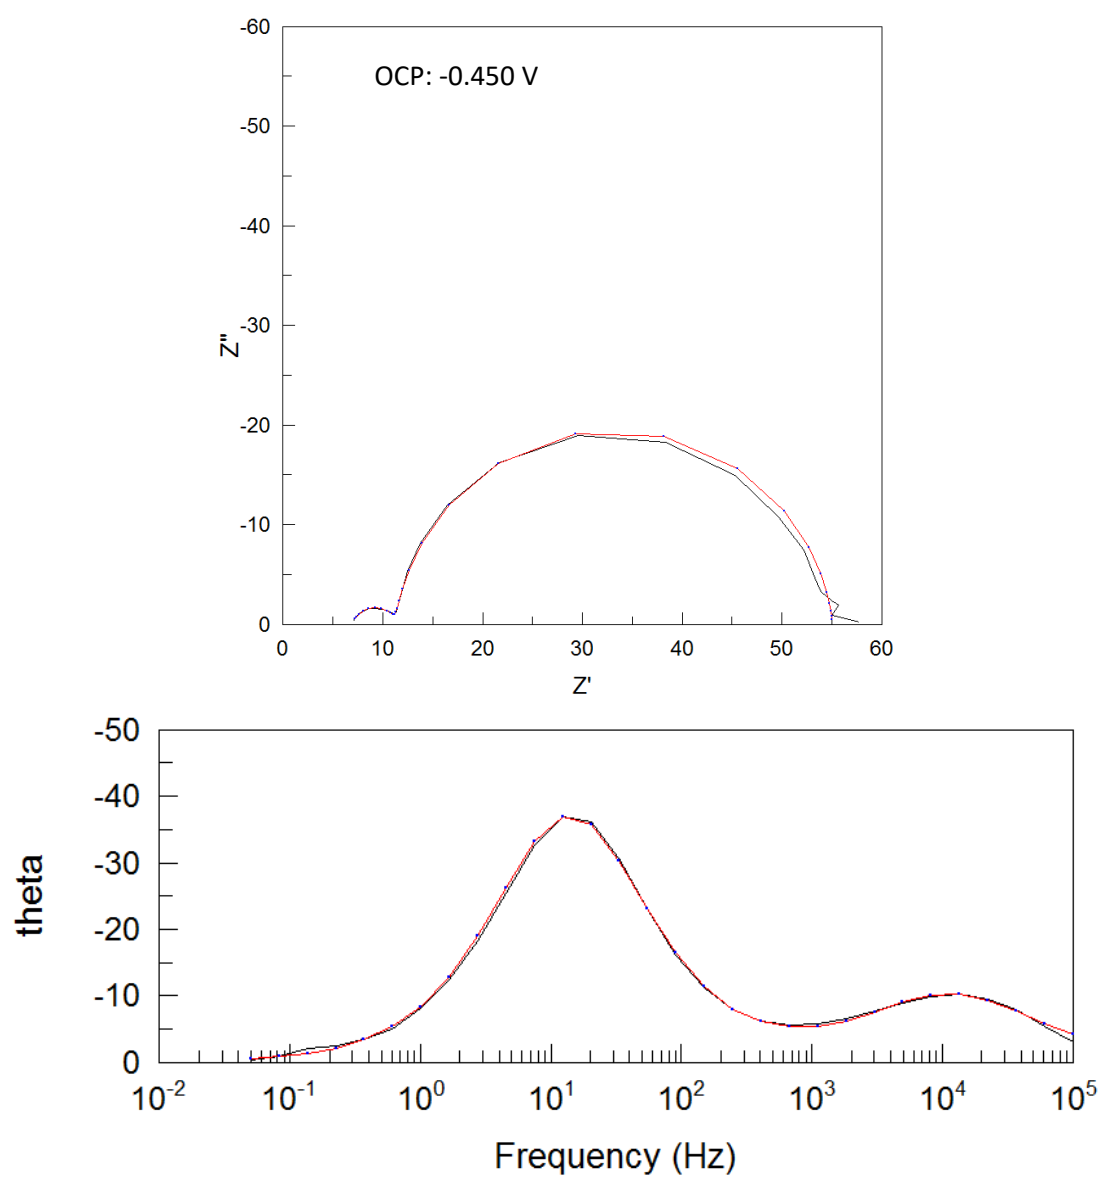

Nyquist (top) and Bode (bottom) plots of E2:

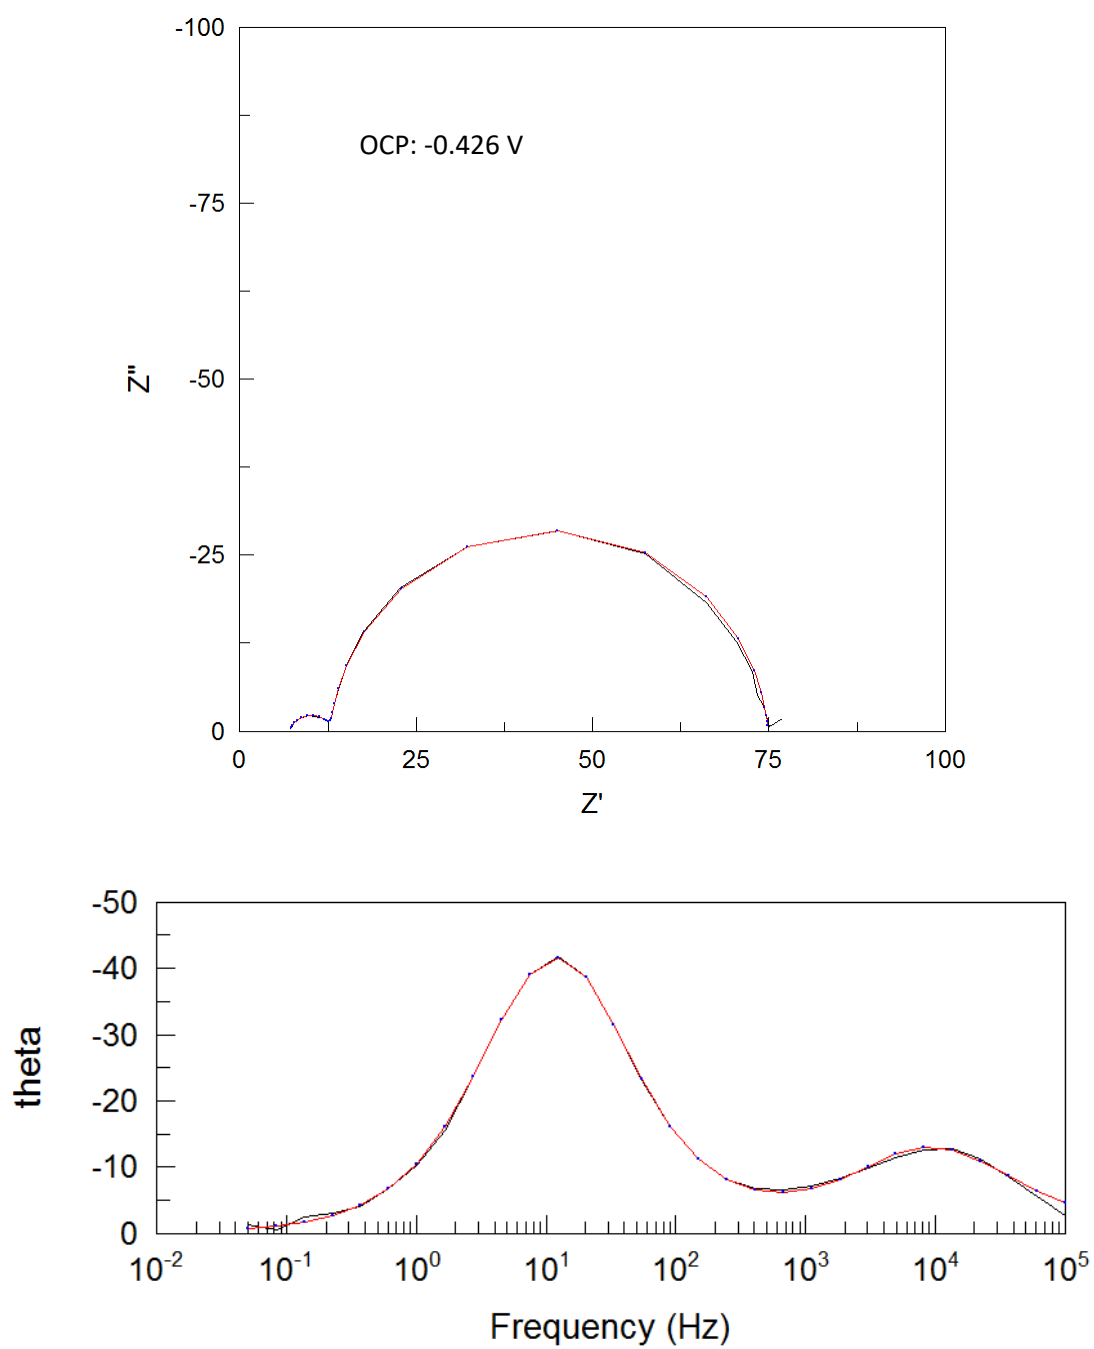

Nyquist (top) and Bode (bottom) plots of **E3**:

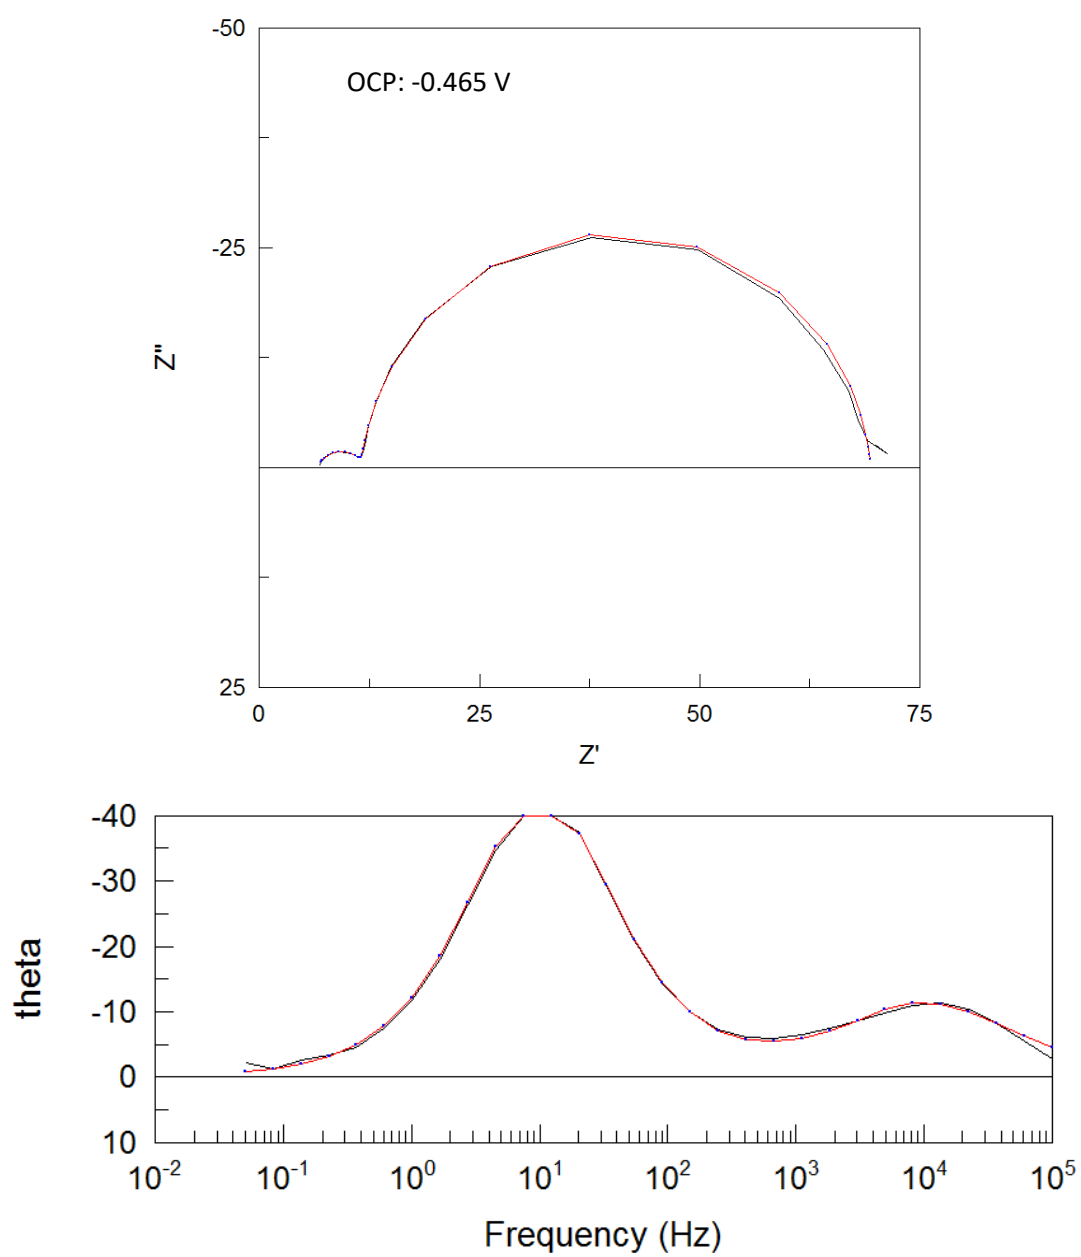

Nyquist (top) and Bode (bottom) plots of **E4**:

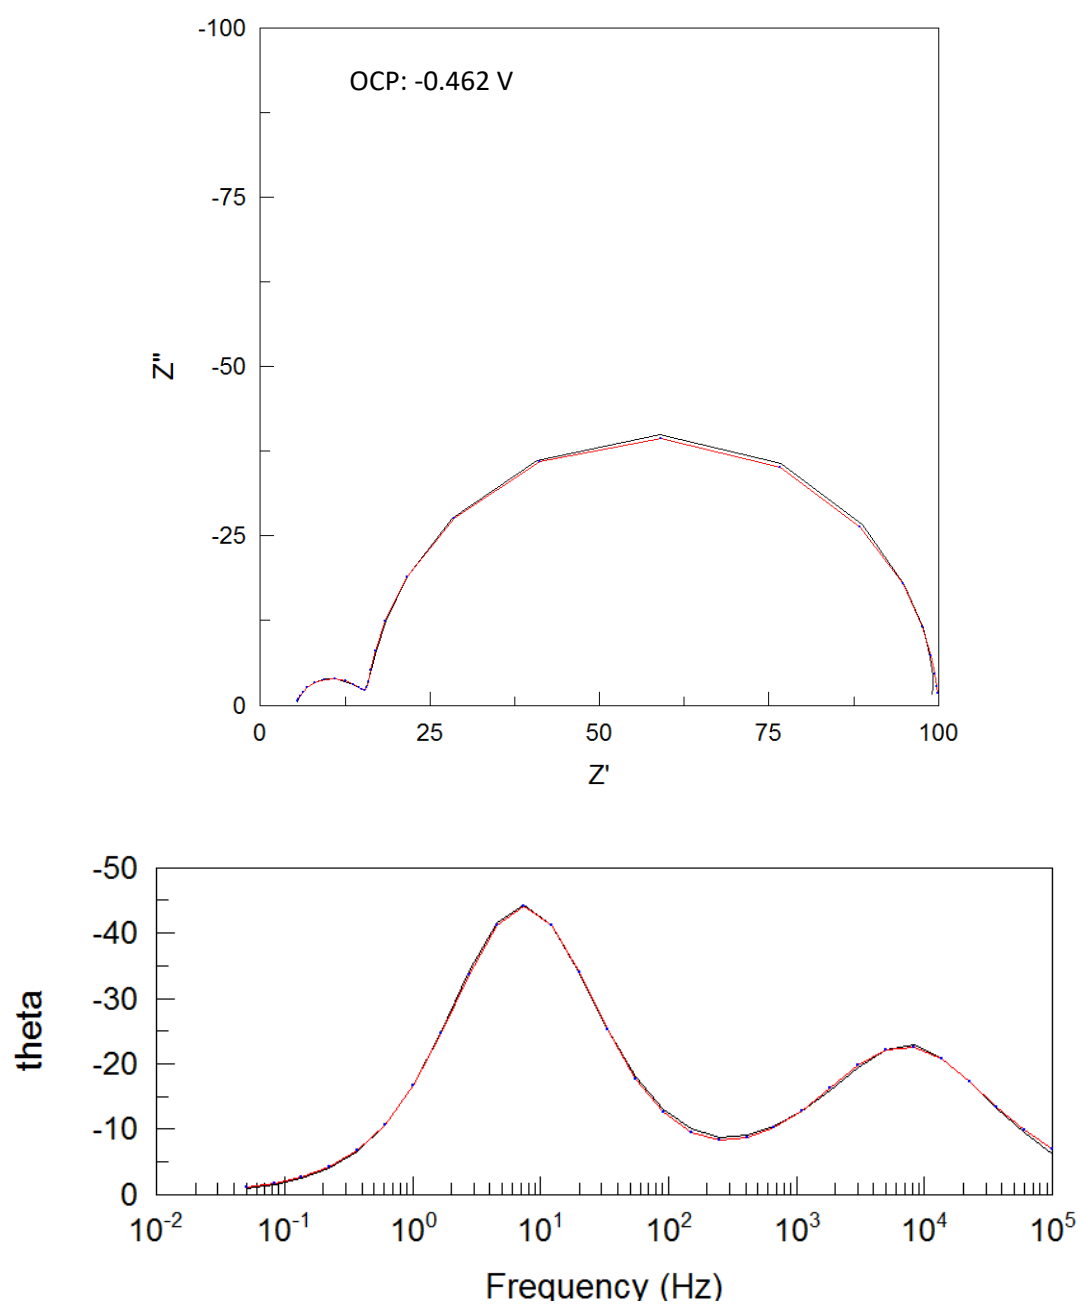



Nyquist (top) and Bode (bottom) plots of **E5**:

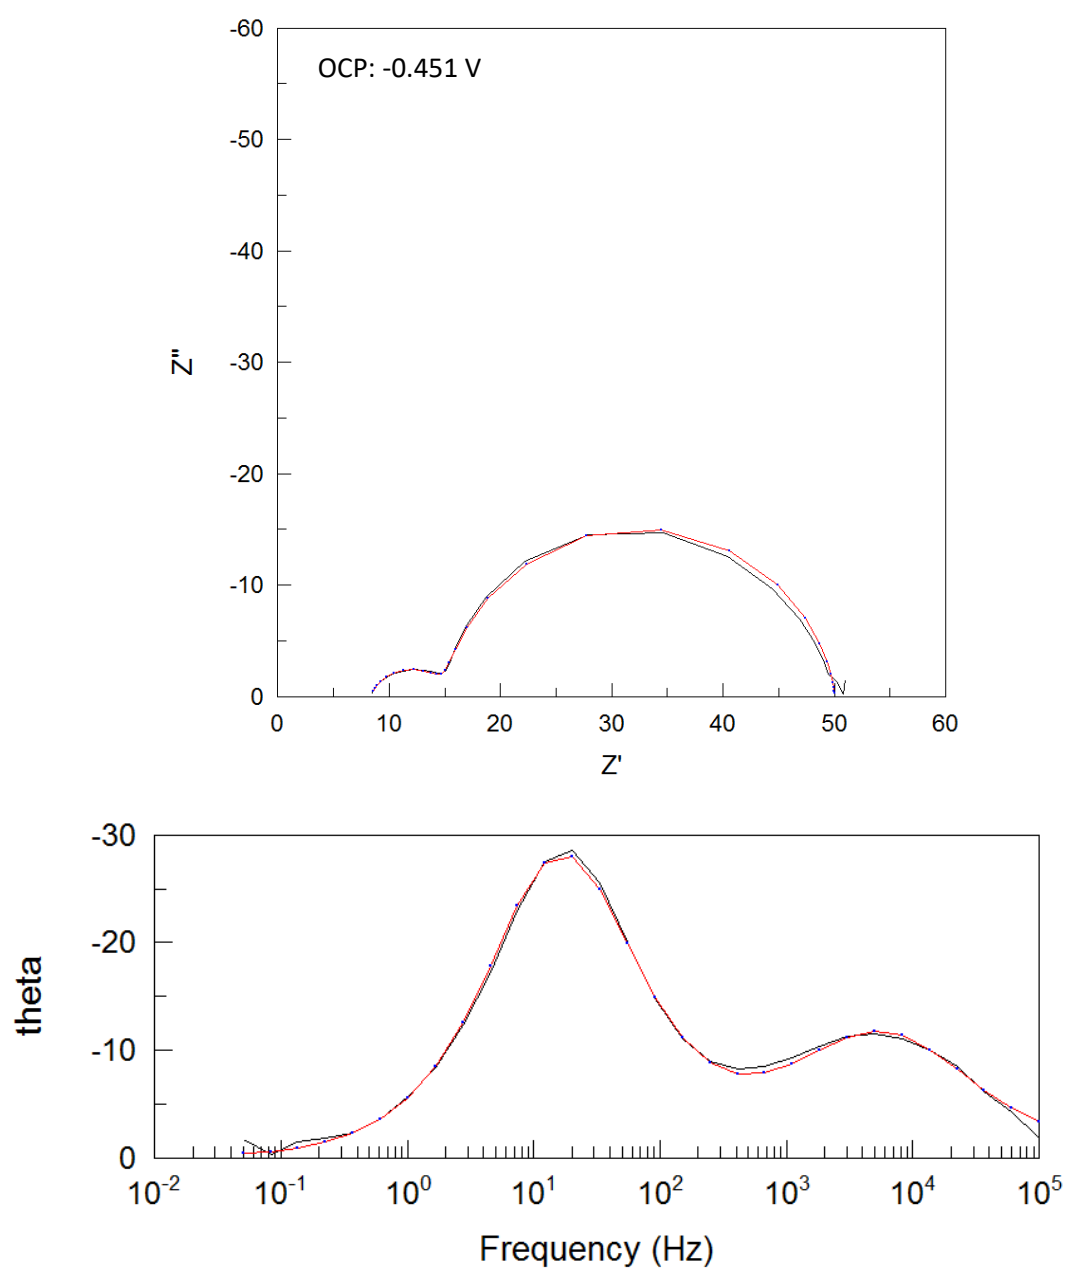

Nyquist (top) and Bode (bottom) plots of E6:

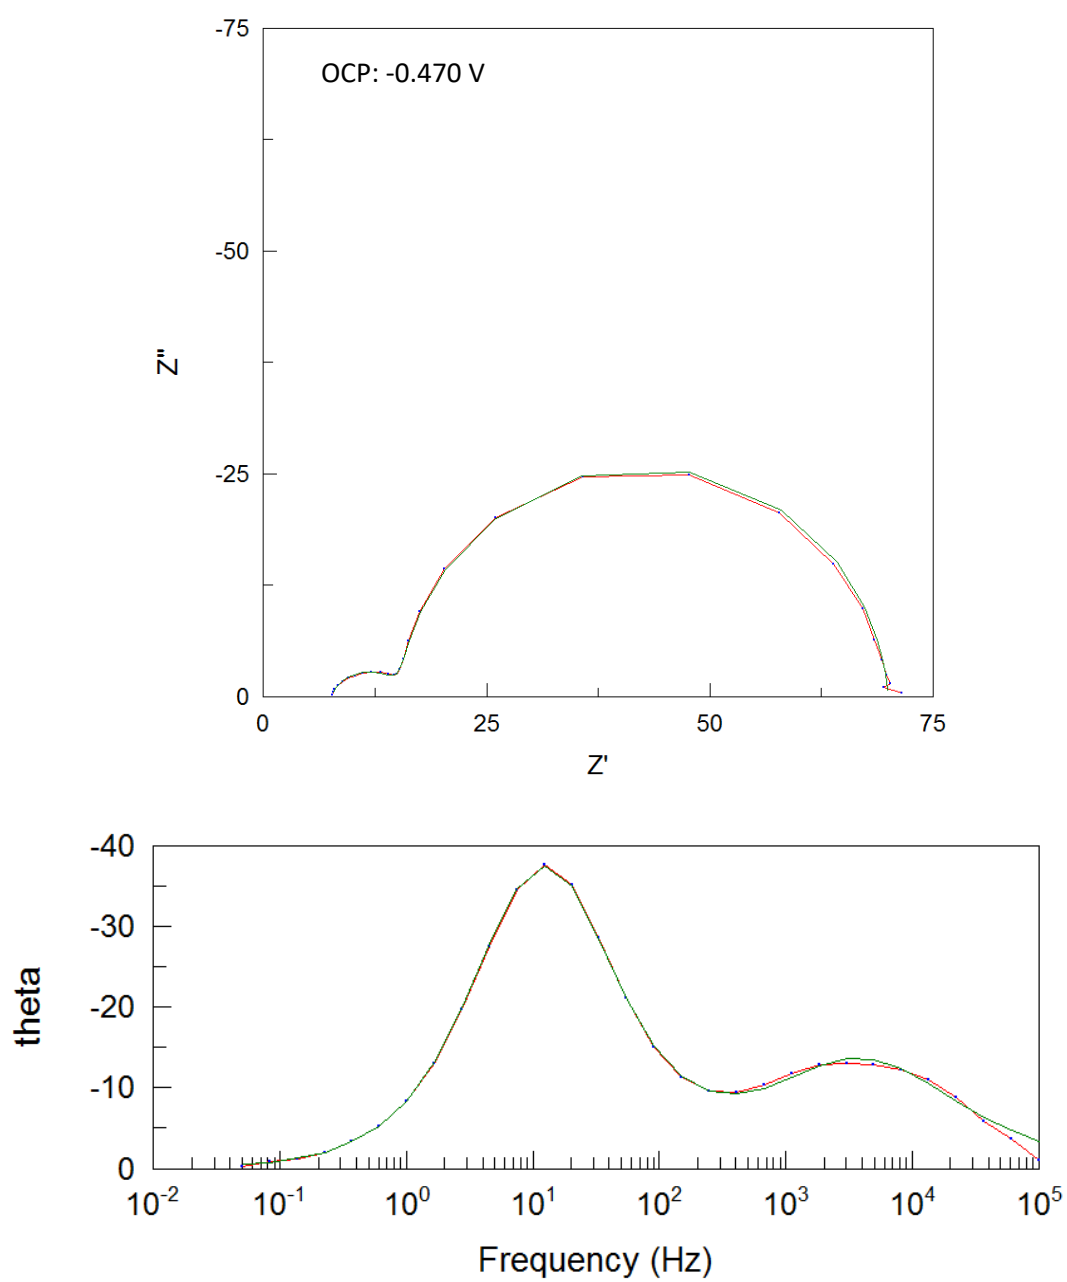

Nyquist (top) and Bode (bottom) plots of **E7**:

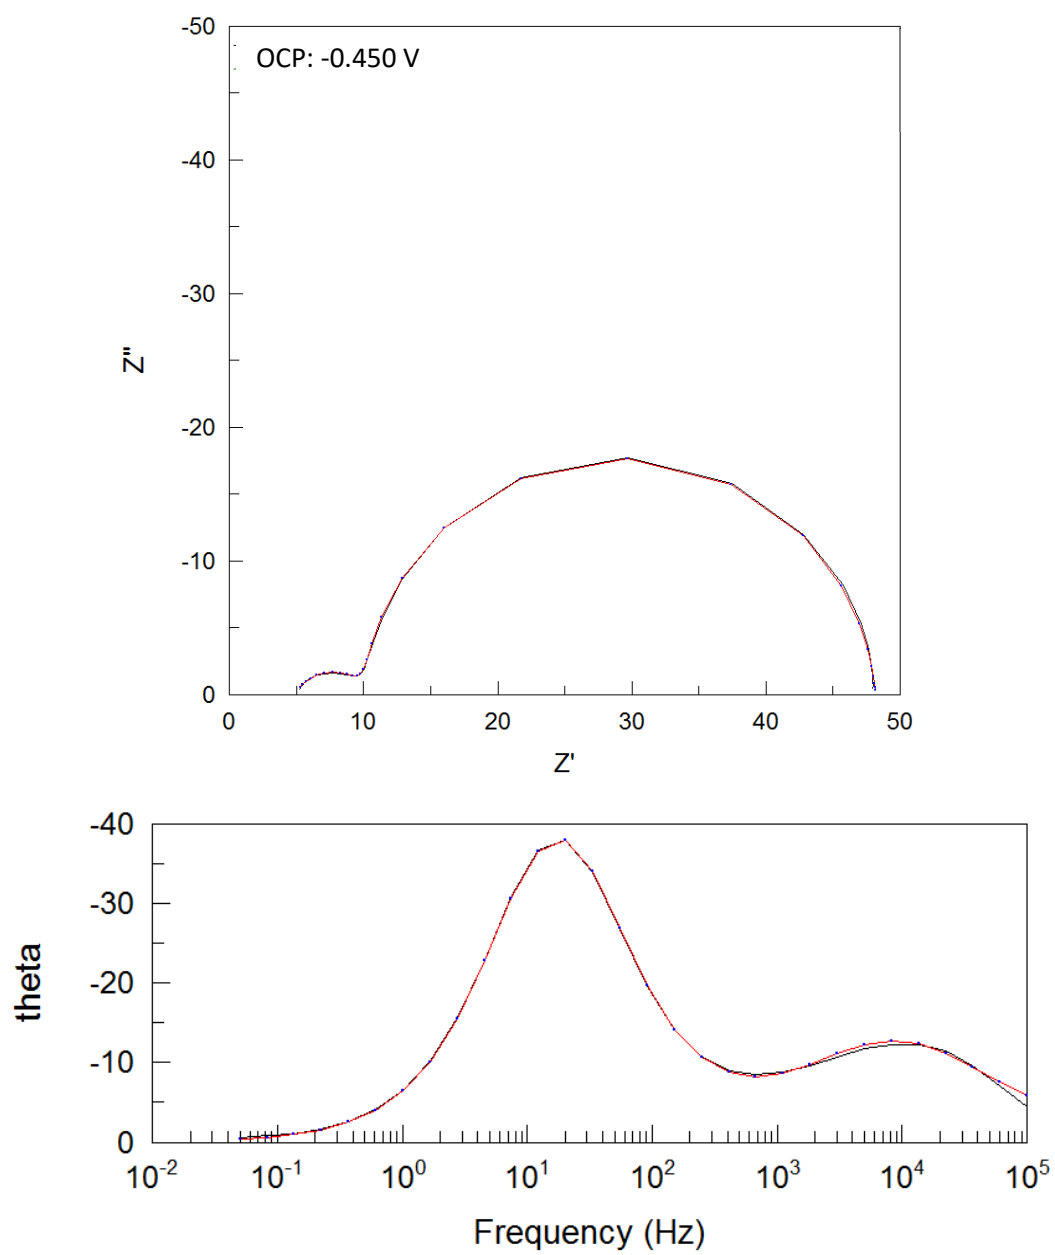

Nyquist (top) and Bode (bottom) plots of **E8**:

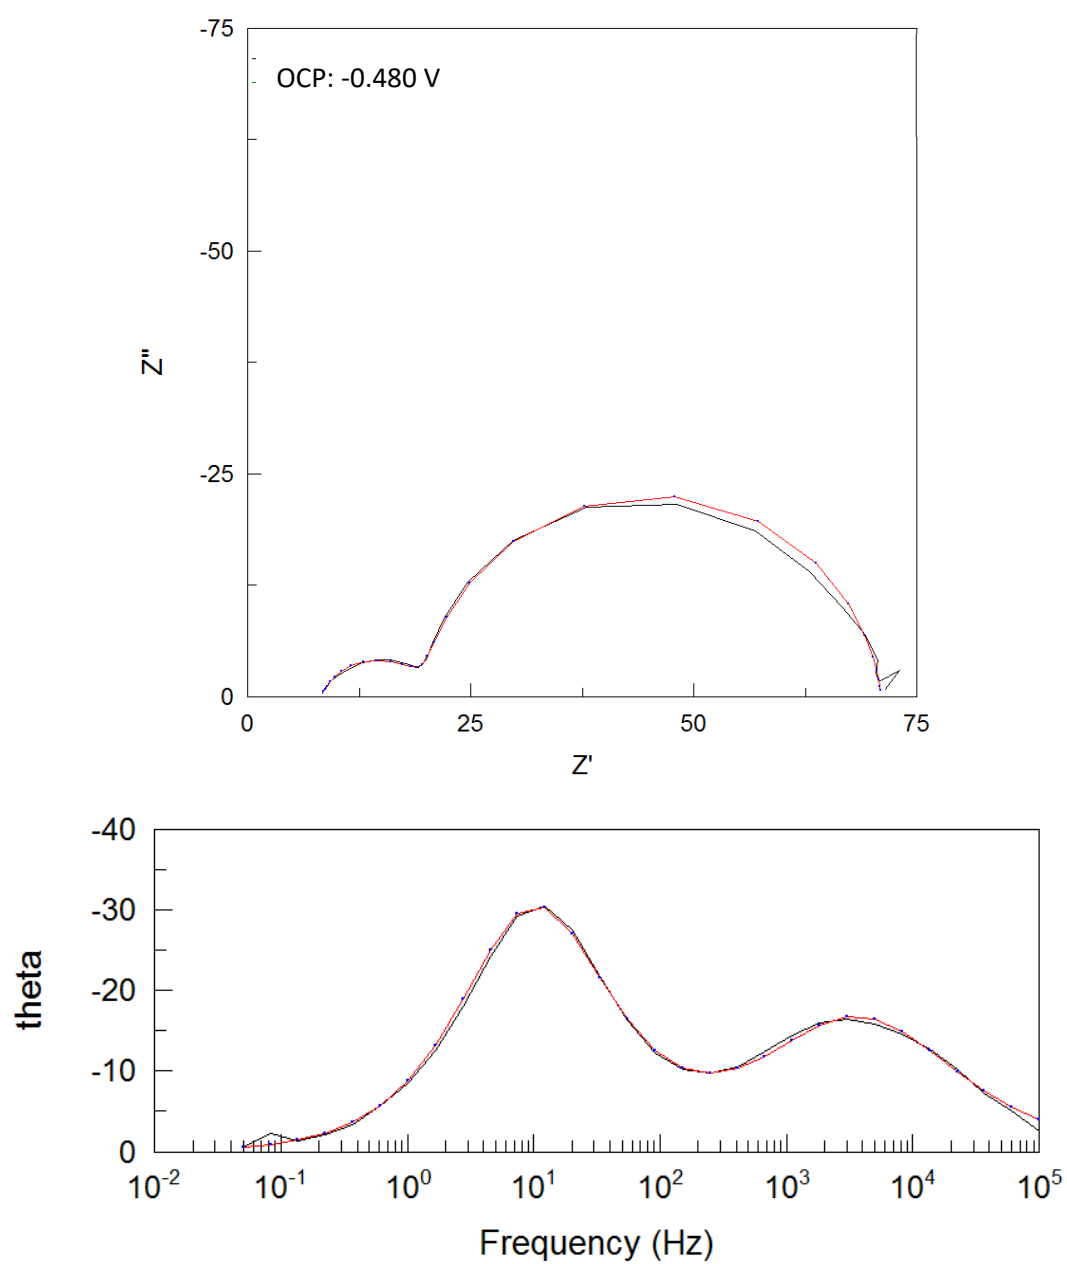

Nyquist (top) and Bode (bottom) plots of **E9**:

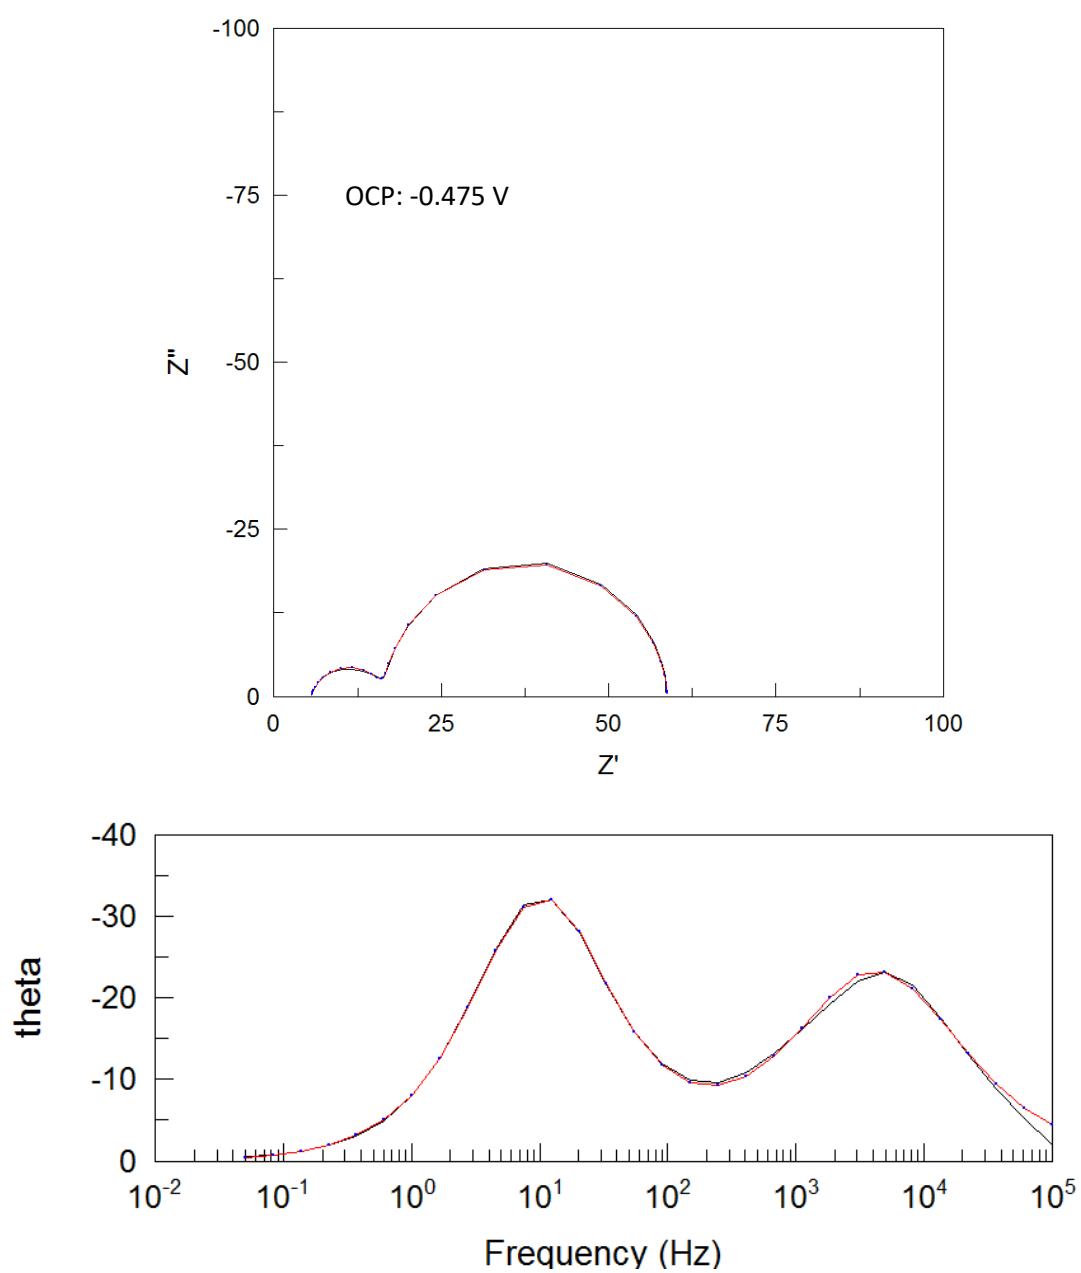

Nyquist (top) and Bode (bottom) plots of **E10**:

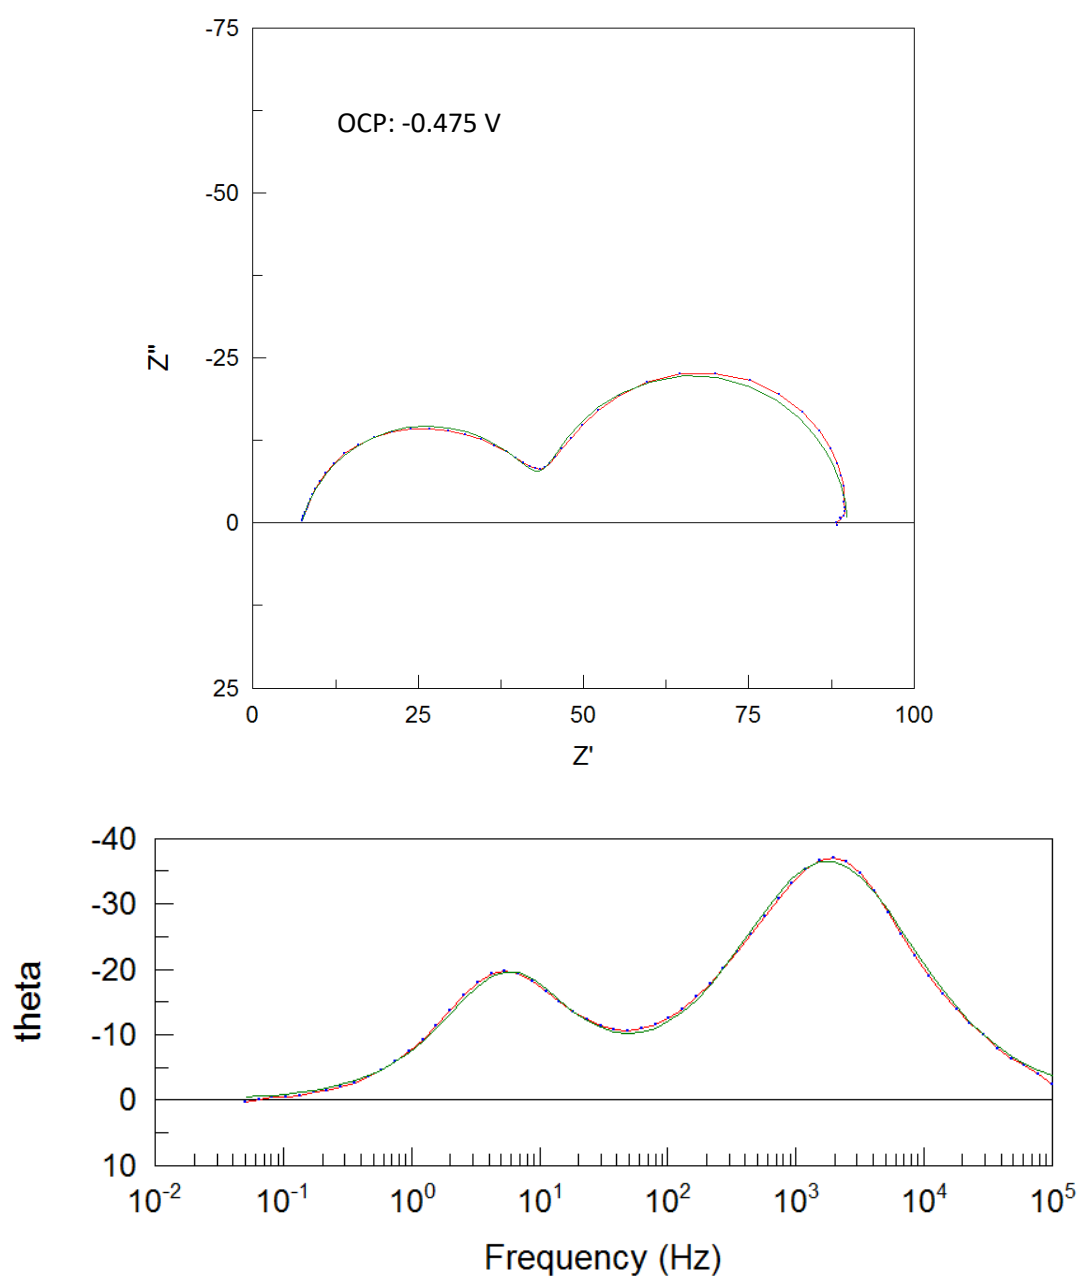

Nyquist (top) and Bode (bottom) plots of **E11**:

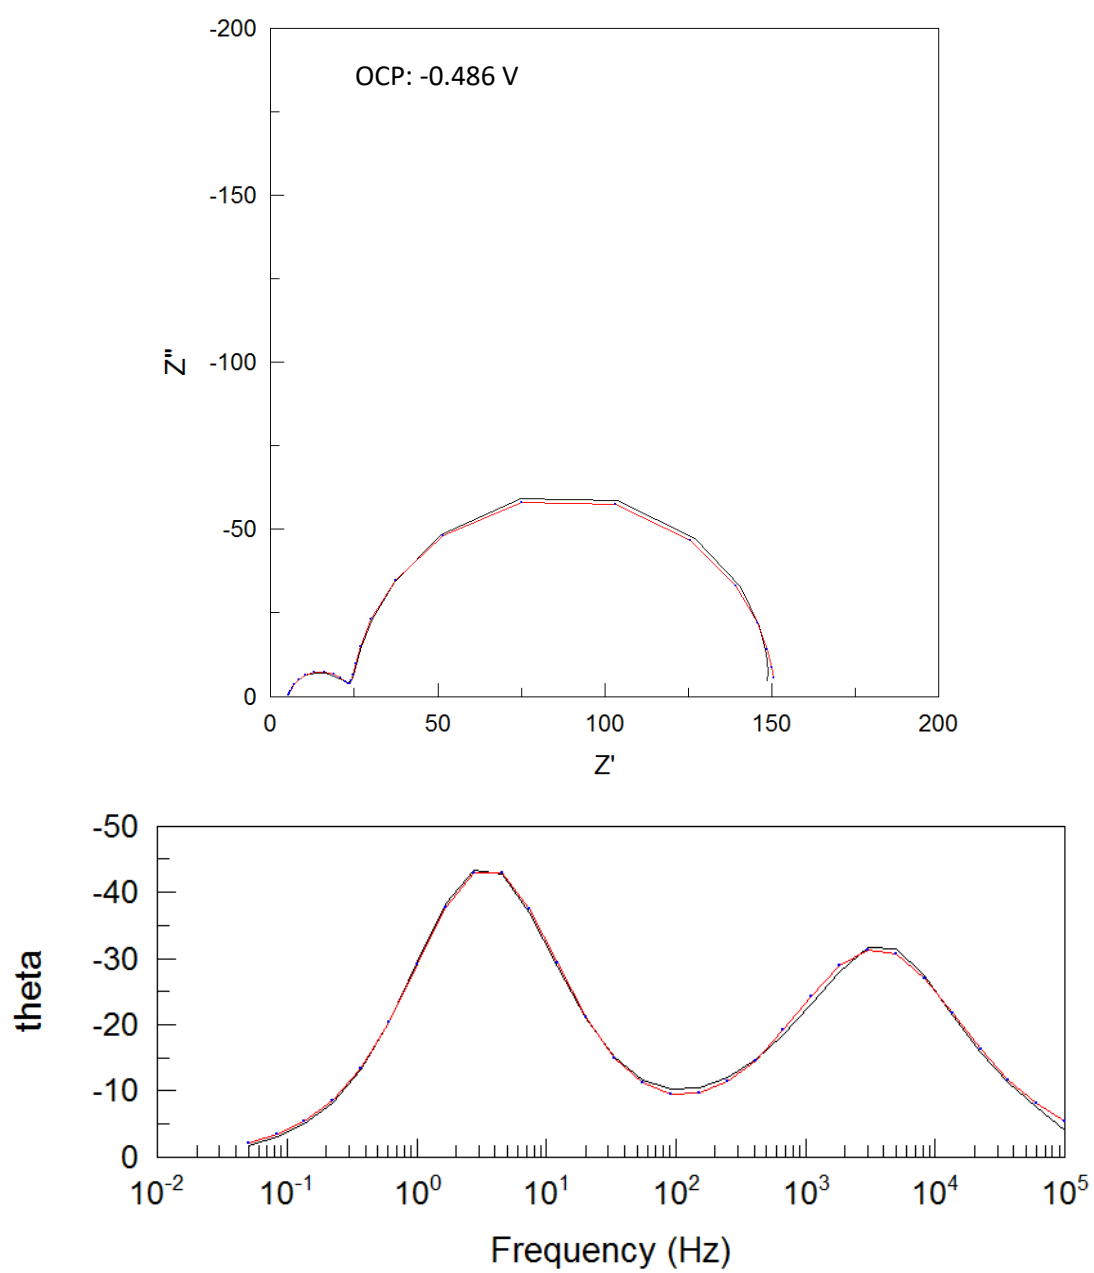

With 4-TBP:

Nyquist (top) and Bode (bottom) plots of reference:

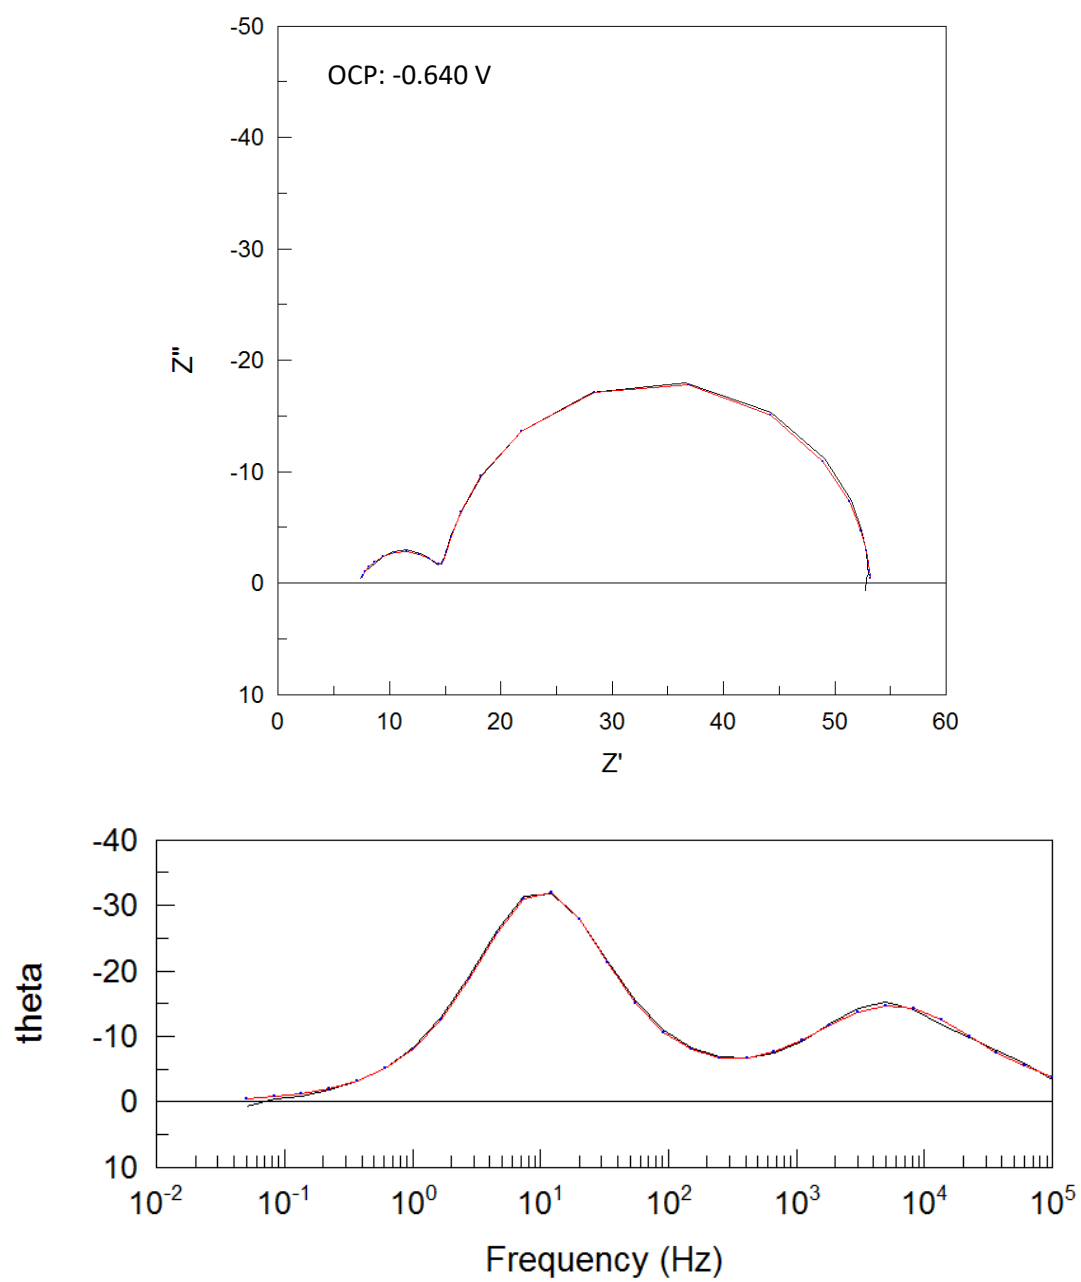



Nyquist (top) and Bode (bottom) plots of **E1**:

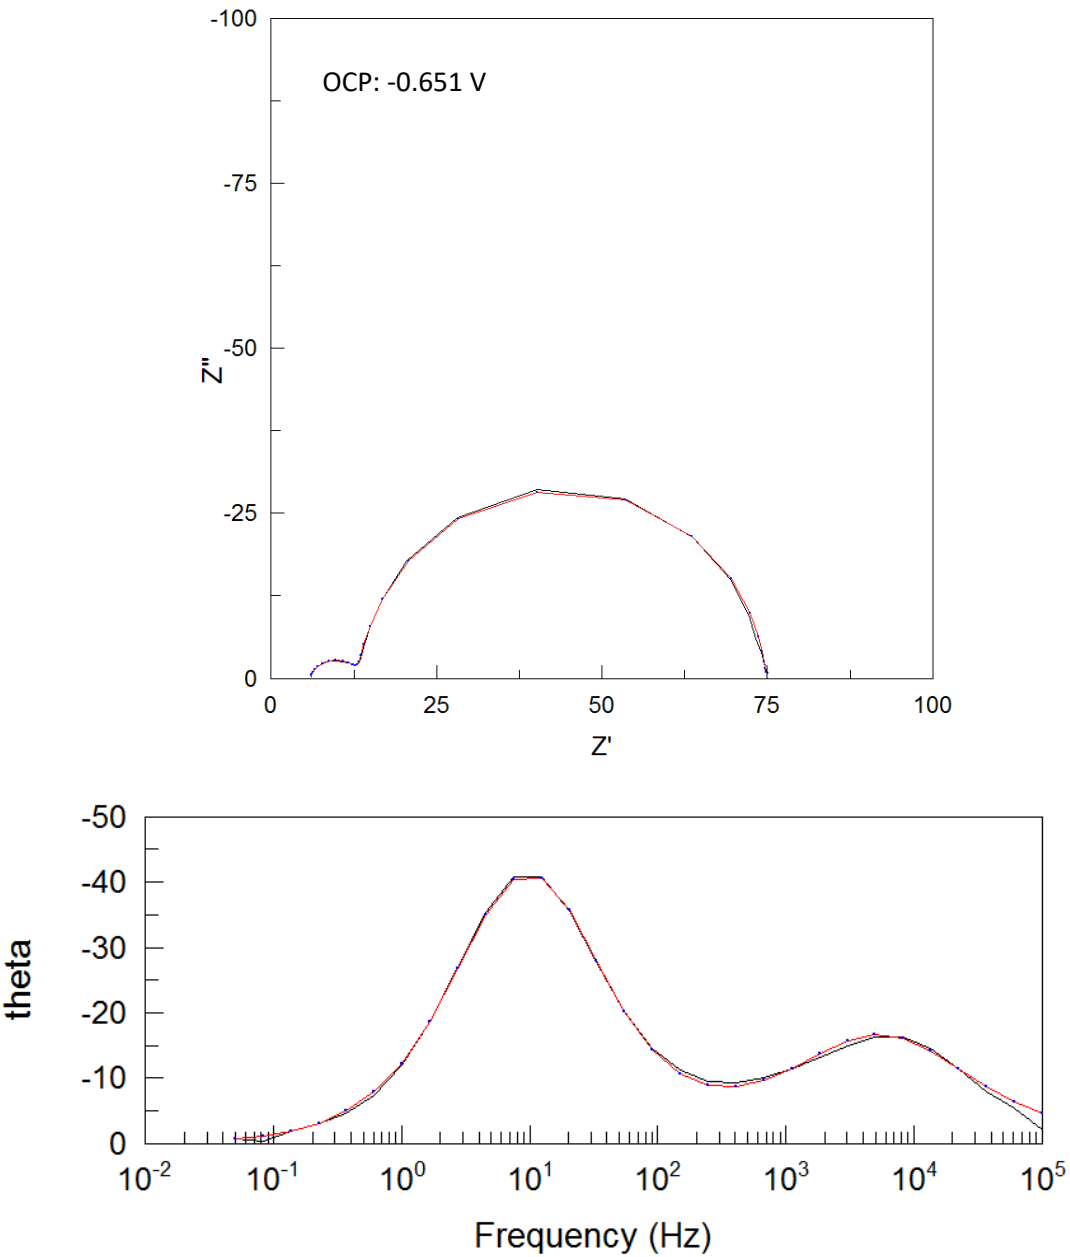

Nyquist (top) and Bode (bottom) plots of E2:

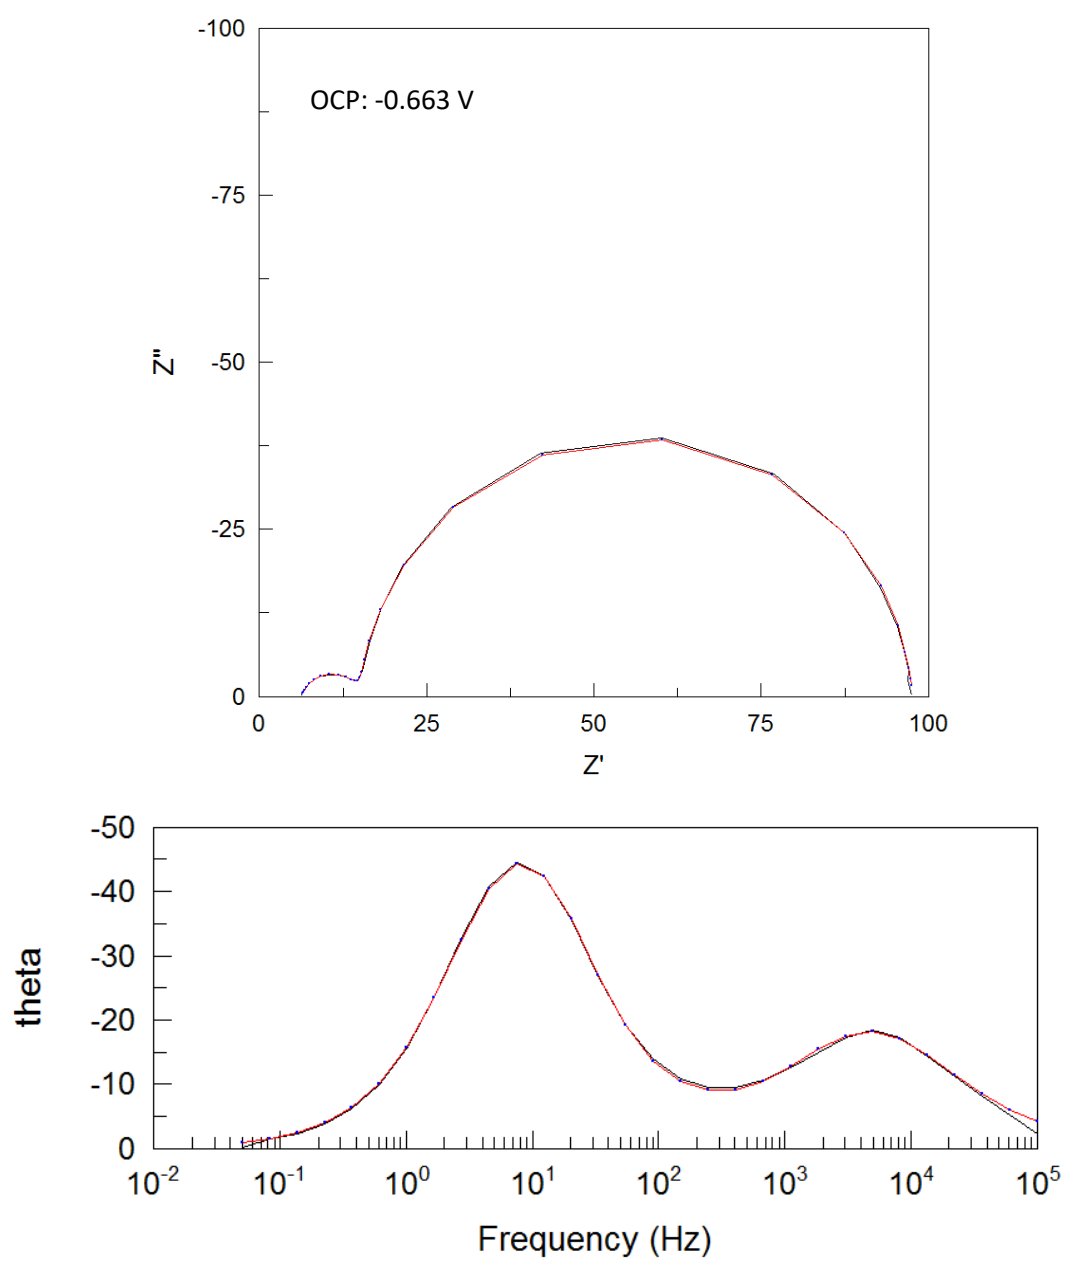

Nyquist (top) and Bode (bottom) plots of **E3**:

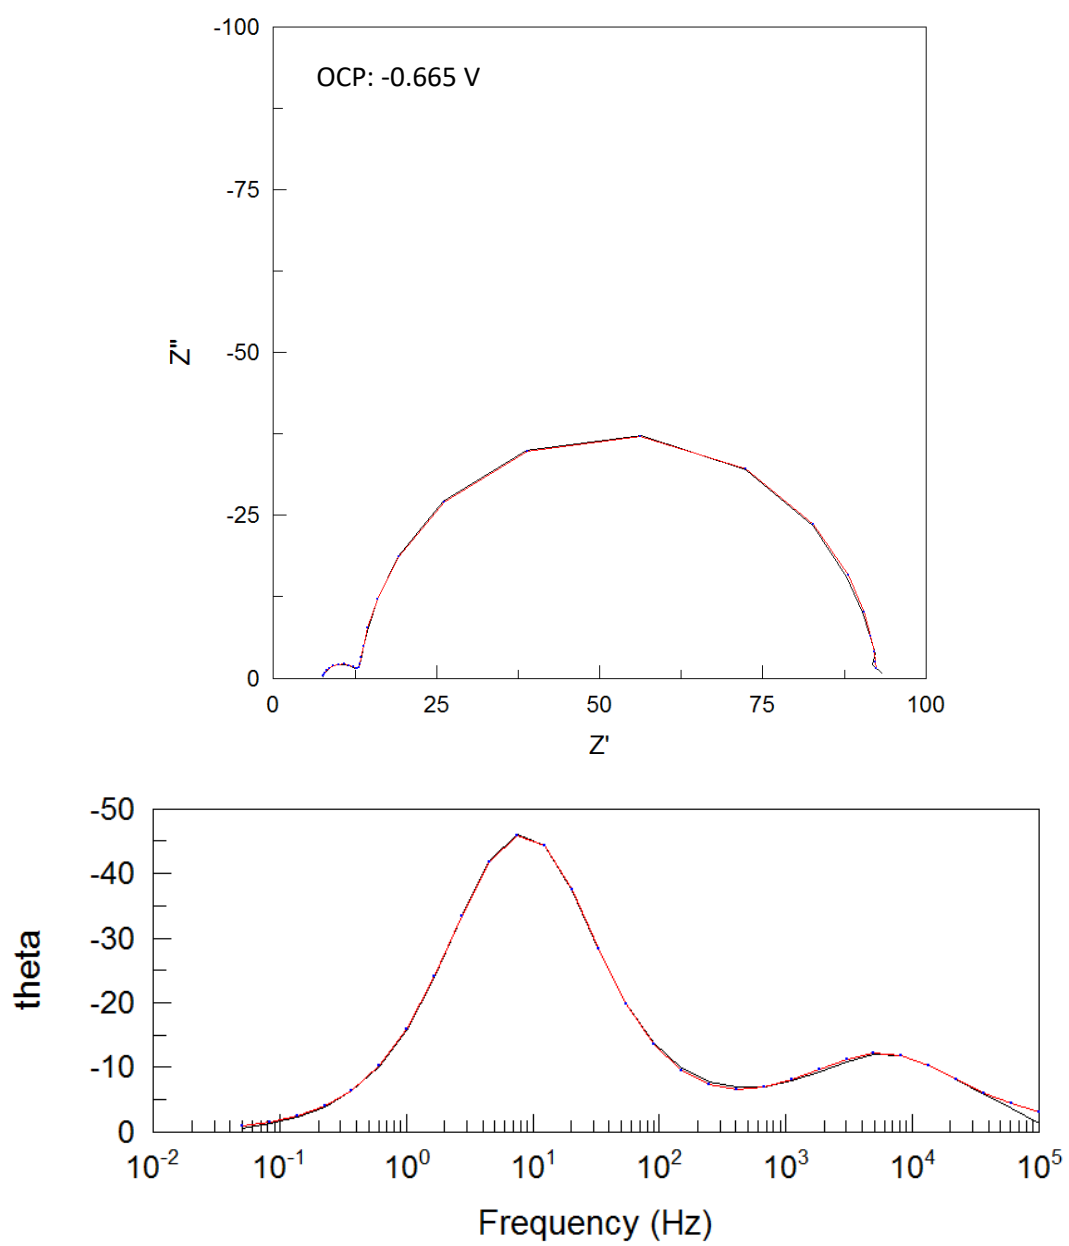

Nyquist (top) and Bode (bottom) plots of **E4**:

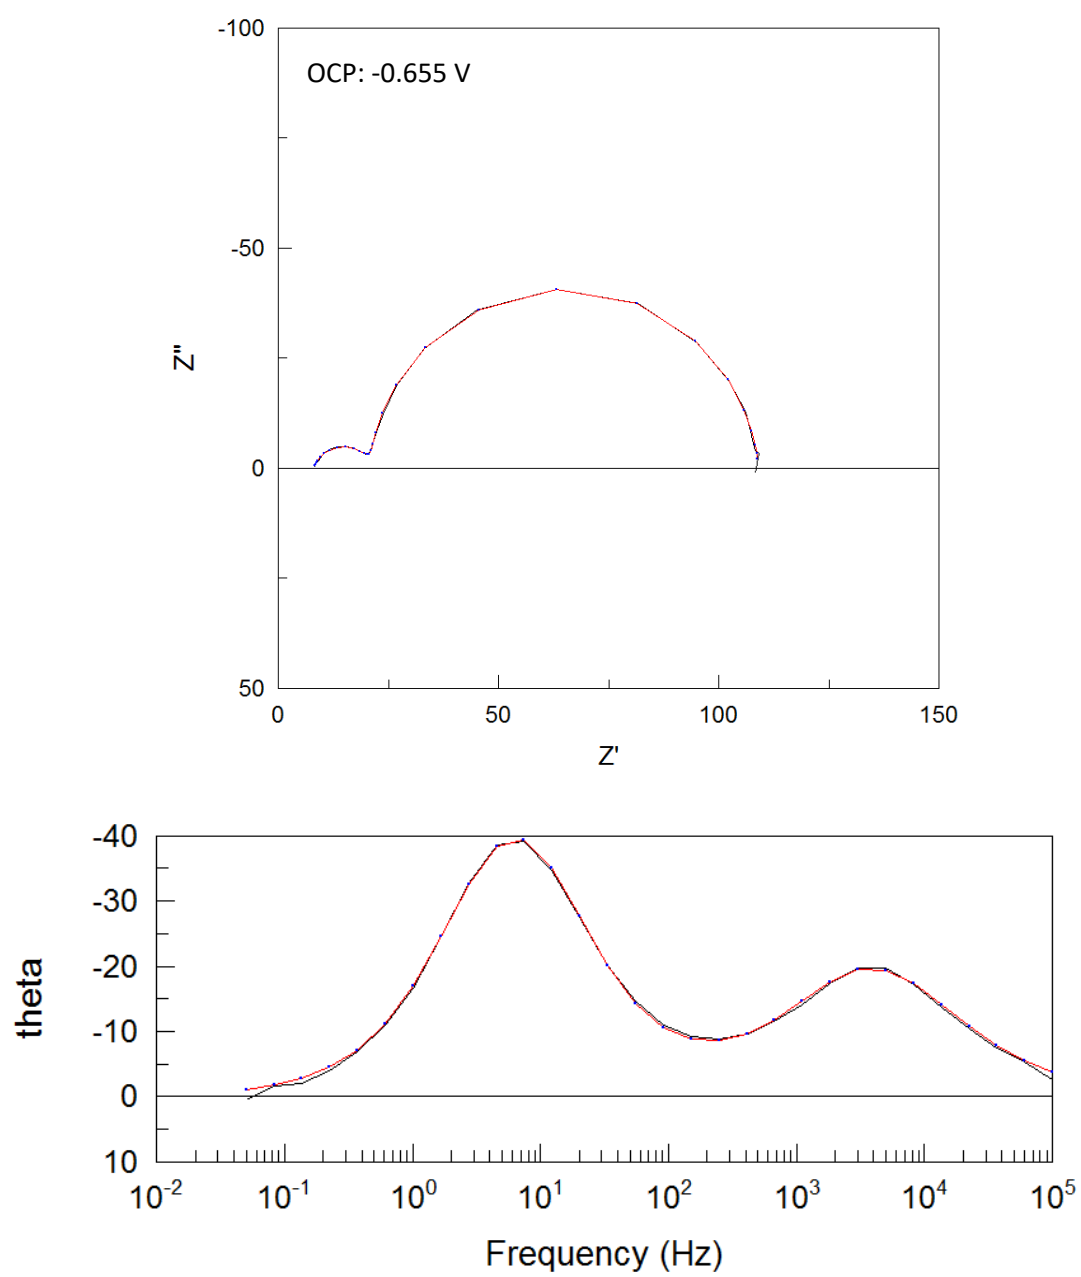

Nyquist (top) and Bode (bottom) plots of **E5**:

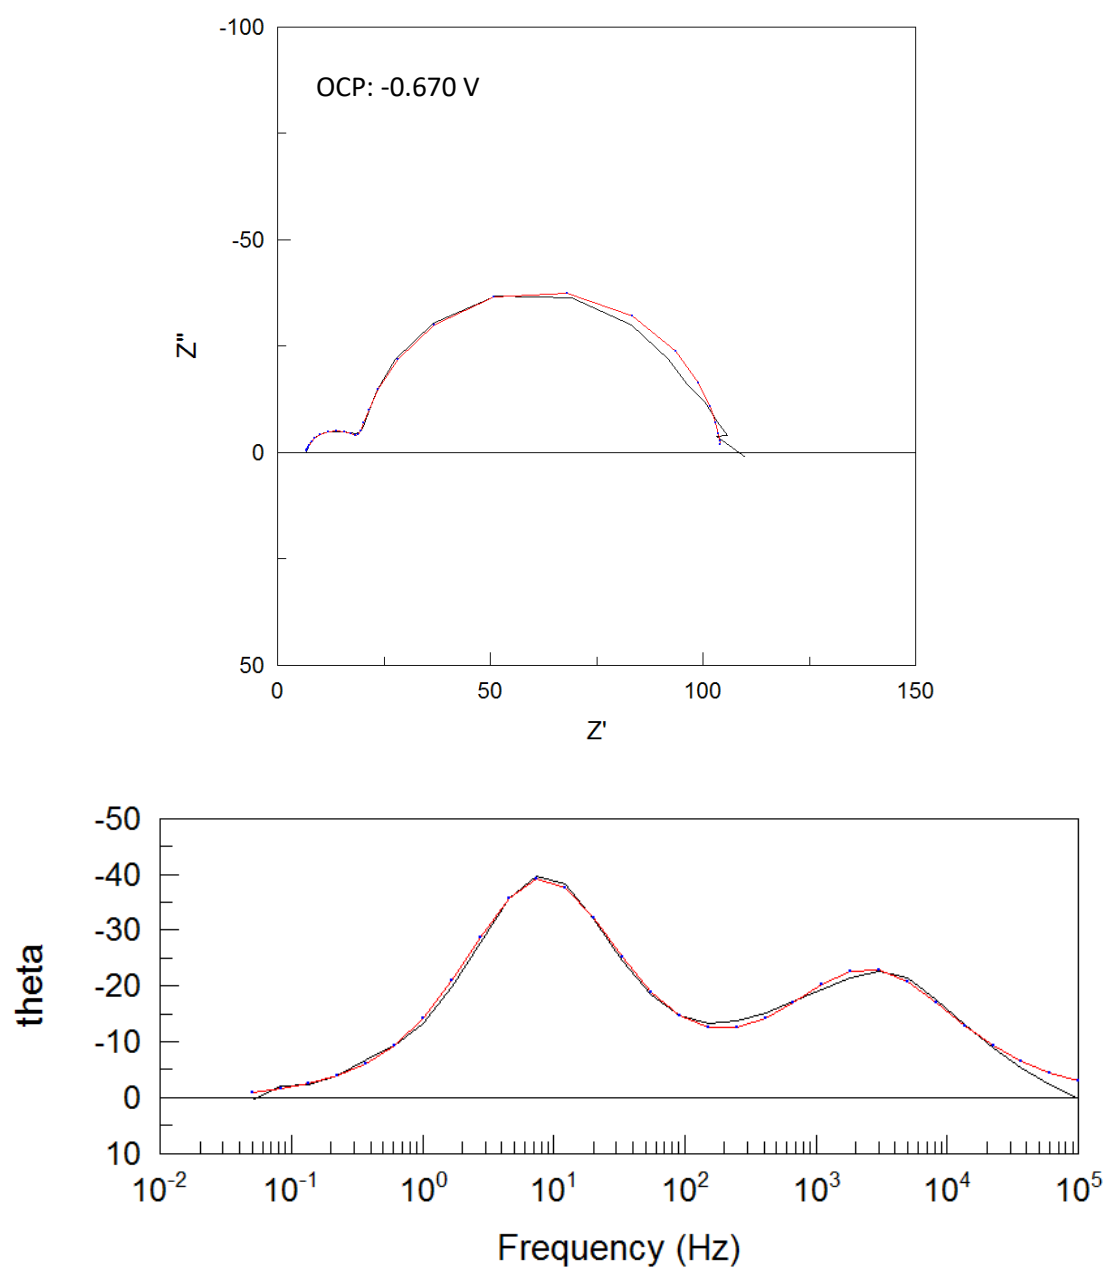

Nyquist (top) and Bode (bottom) plots of E6:

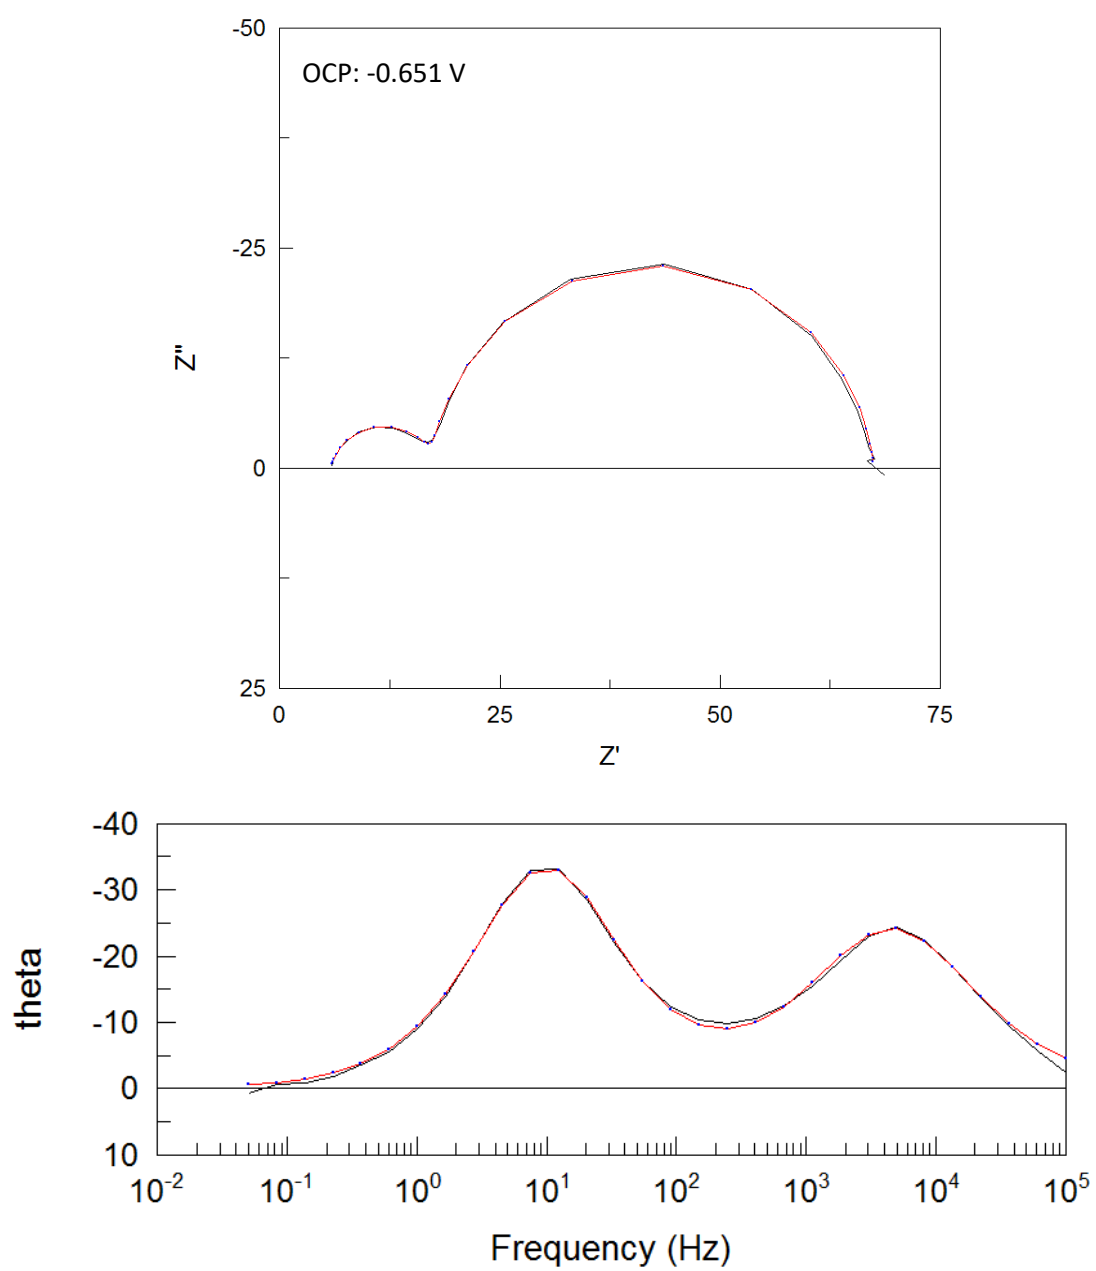

Nyquist (top) and Bode (bottom) plots of **E7**:

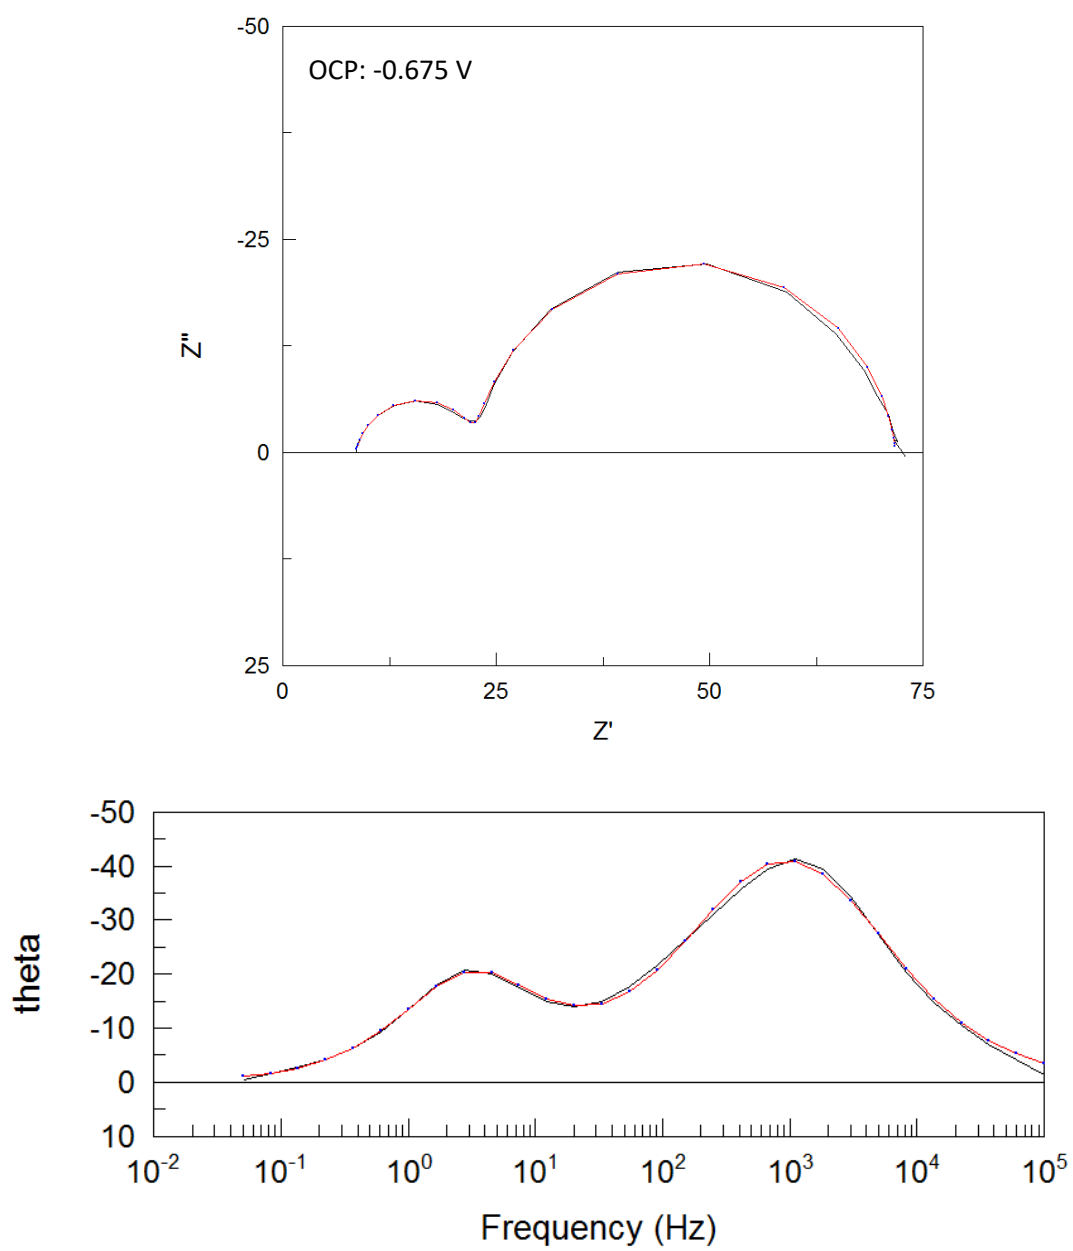

Nyquist (top) and Bode (bottom) plots of **E8**:

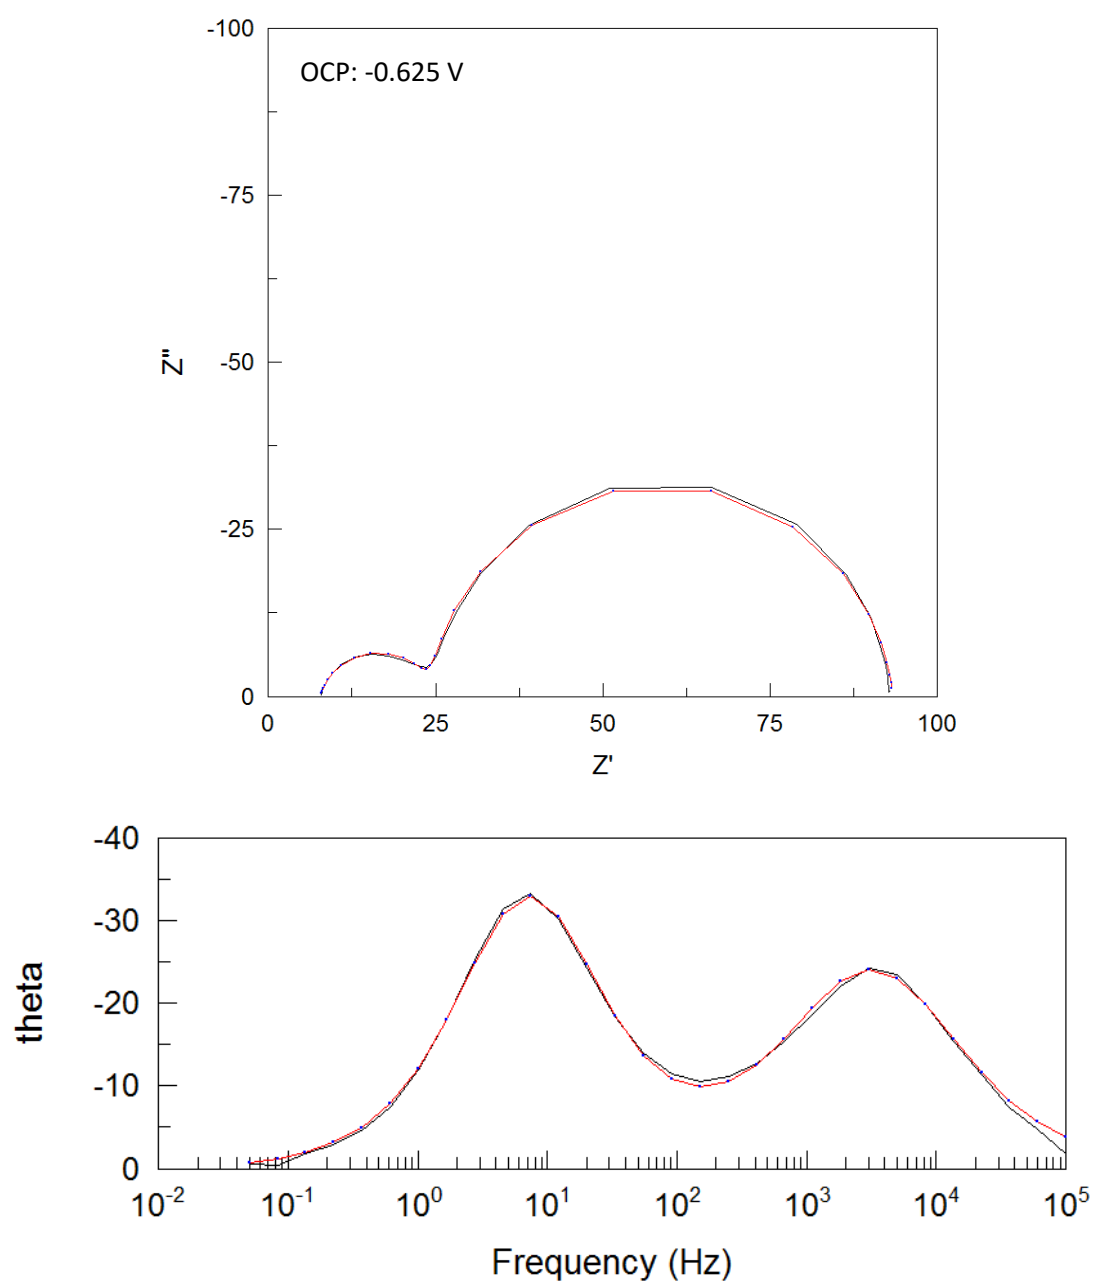



Nyquist (top) and Bode (bottom) plots of **E9**:

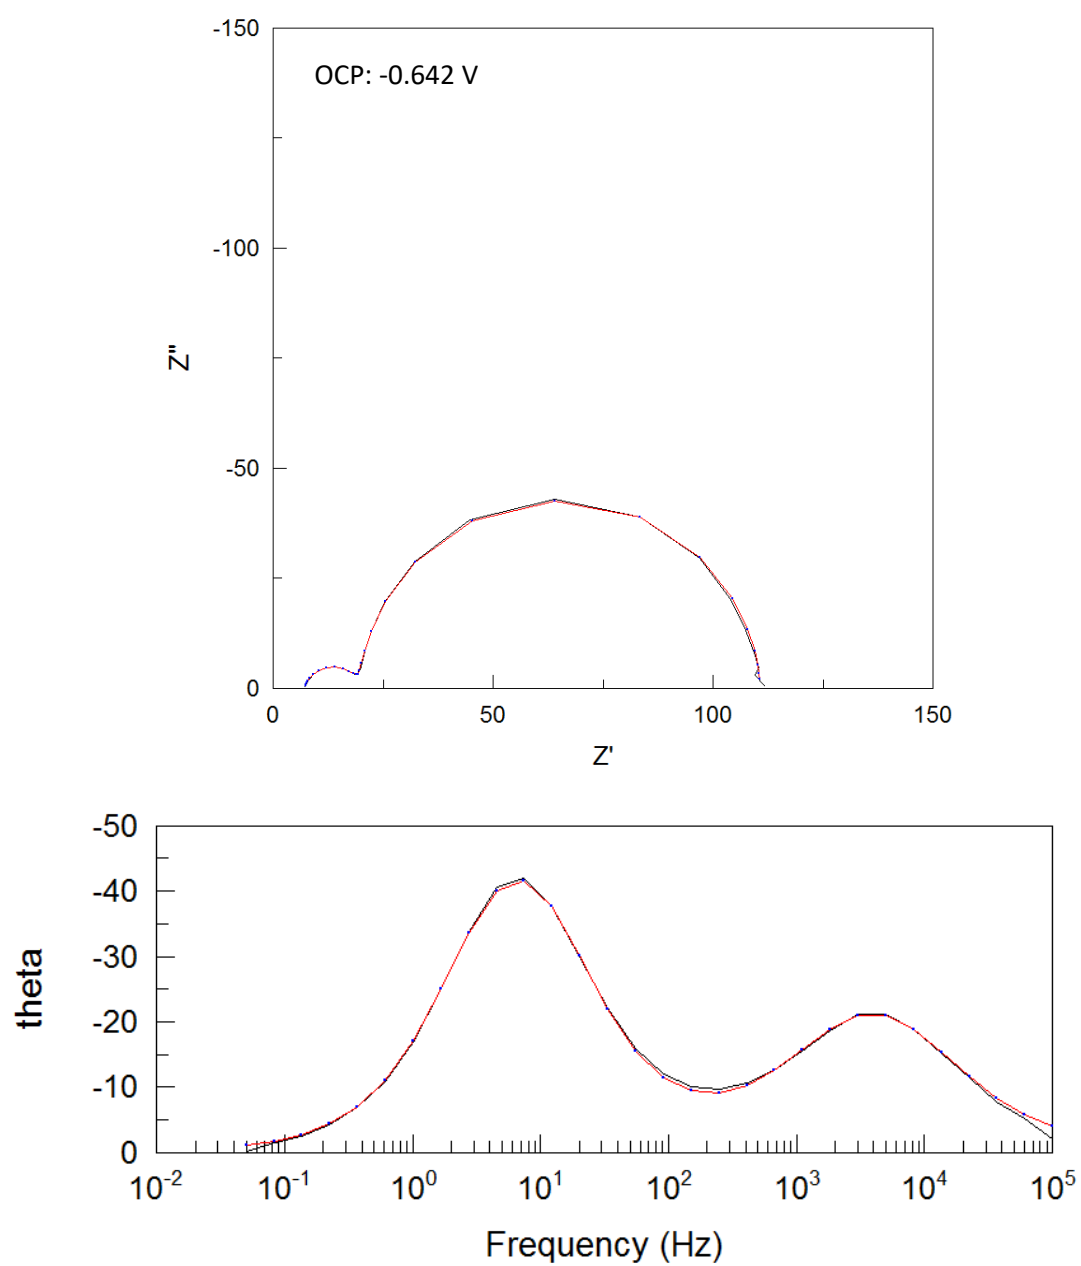

Nyquist (top) and Bode (bottom) plots of **E10**:

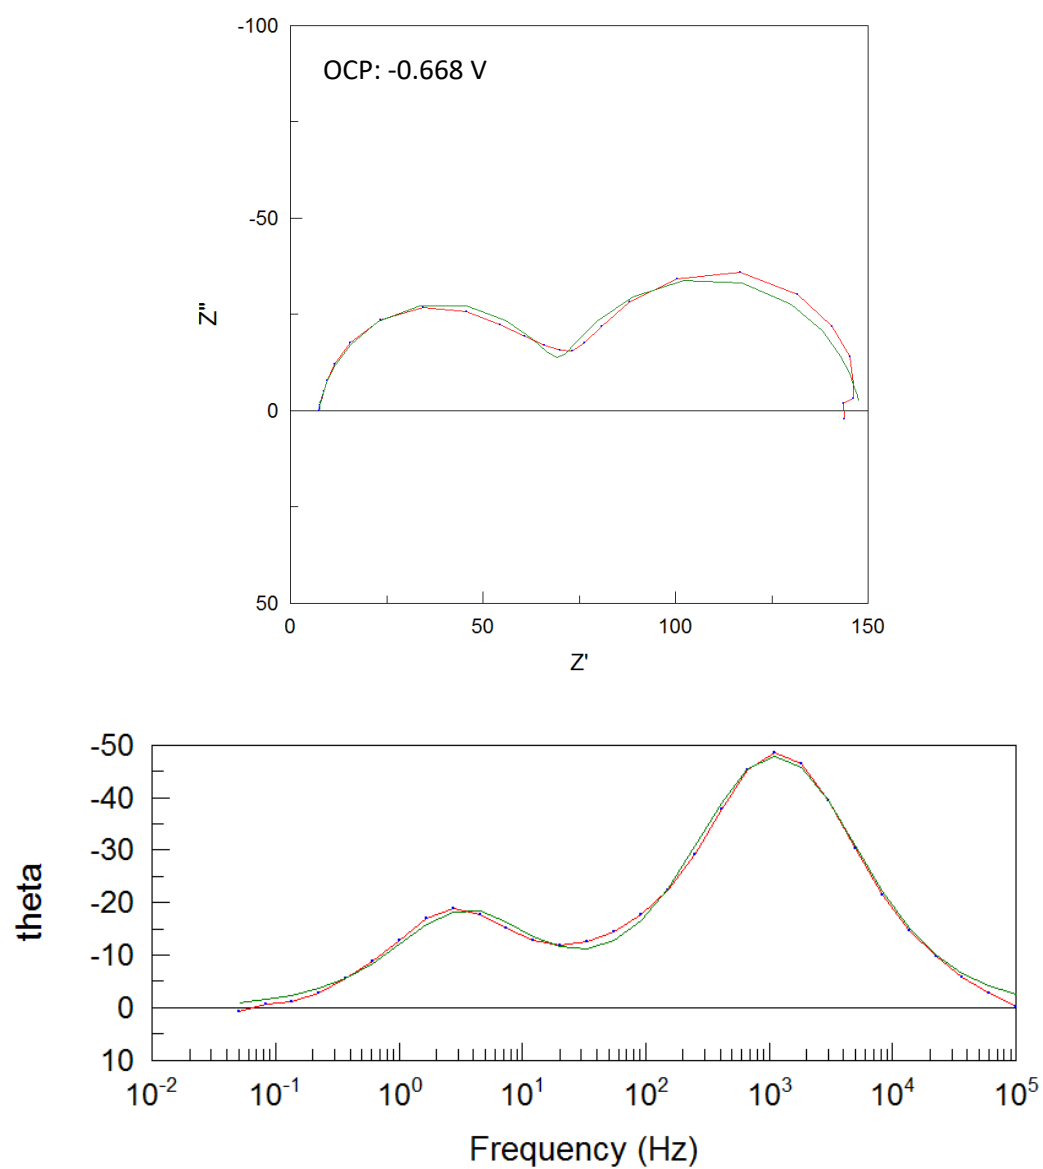

Nyquist (top) and Bode (bottom) plots of **E11**:

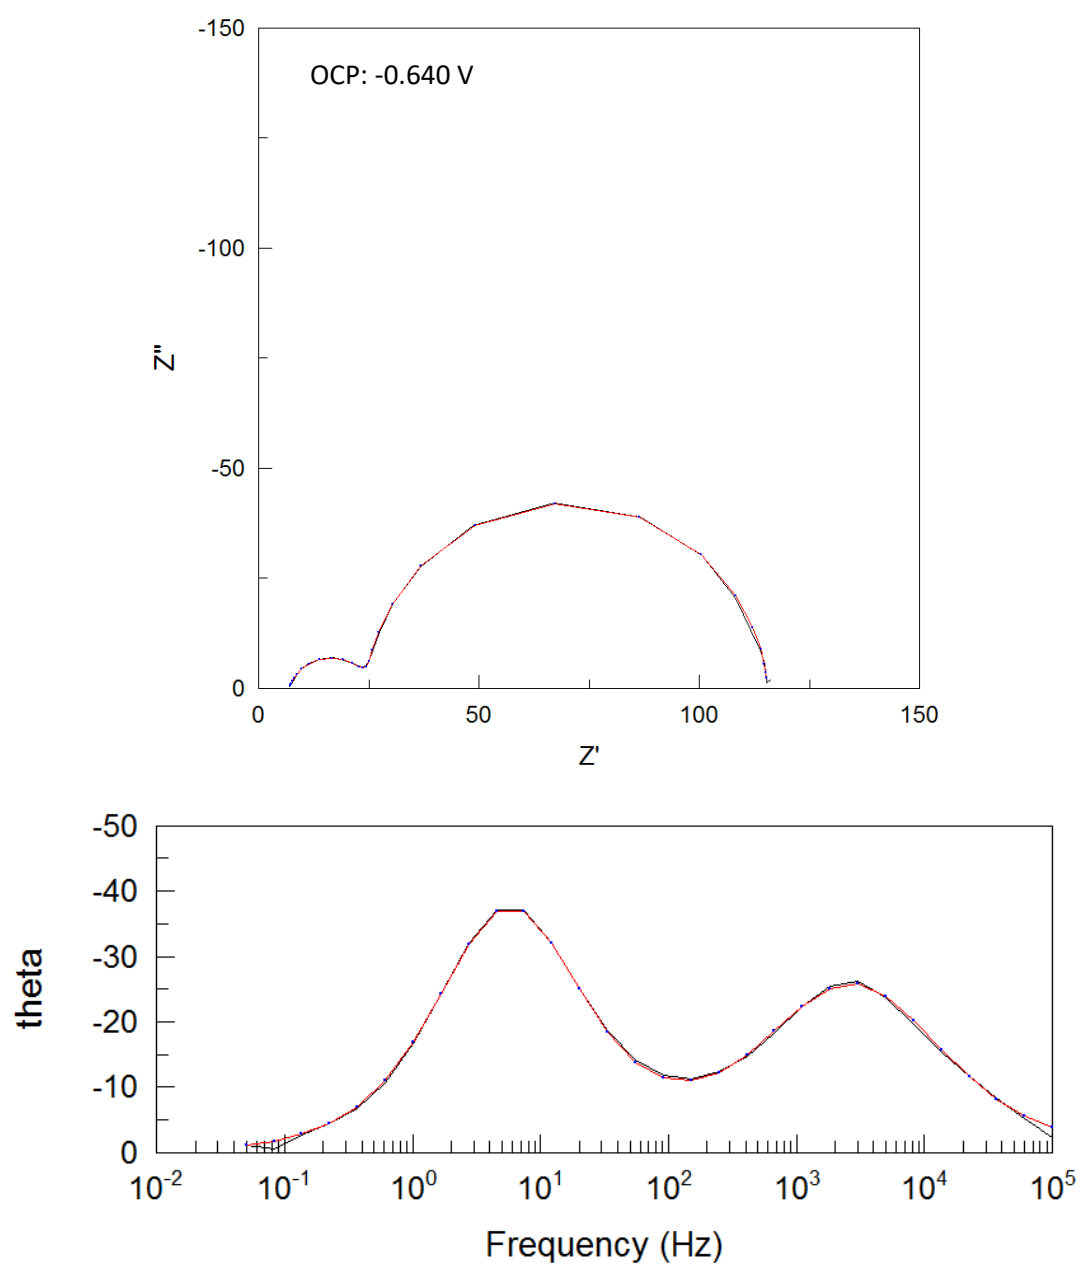

1. Huang, J.; Riisager, A.; Wasserscheid, P.; Fehrmann, R., Reversible physical absorption of SO<sub>2</sub> by ionic liquids. *Chem. Commun.* **2006**, (38), 4027-4029, doi: 10.1039/b609714f.
